# Supplementary material for: In silico modelling, identification of crucial molecular fingerprints, and prediction of new possible substrates of human organic cationic transporters 1 and 2
Source: Royal Society of Chemistry journal article supplement (doi:10.1039/c9nj05825g), 2020-01-01
Supplement: c9nj05825g1.pdf [file c9nj05825g1.pdf]

### Supplementary materials

#### *In silico* modelling, identification of crucial molecular fingerprints, and prediction of new possible substrates of human organic cationic transporters 1 and 2

Anurag T.K. Baidya<sup>1</sup>, Kalyan Ghosh<sup>1</sup>, Sk. Abdul Amin<sup>2</sup>, Nilanjan Adhikari<sup>2</sup>, Nirmal Jayabalan<sup>3,\*</sup>,  
Tarun Jha<sup>2,\*</sup> and Shovanlal Gayen<sup>1,\*</sup>

<sup>1</sup>Laboratory of drug design and discovery, Department of Pharmaceutical Sciences, Dr. H. S. Gour University, Sagar, MP, <sup>2</sup>Natural science Laboratory, Division of Medicinal and Pharmaceutical Chemistry, Department of Pharmaceutical Technology, P. O. Box 17020, Jadavpur University, Kolkata, <sup>3</sup>Department of Pharmacy, BITS-Pilani, Hyderabad Campus, Hyderabad 500078, India

**Supplementary Table 1.** List of Compounds with SMILES along with their ratio of uptake into OCT-transfected/empty vector transfected cells for hOCT1 and hOCT2.

| No | SMILES                                                                                                                                                                                           | hOC T1 ratio | hOC T2 ratio |
|----|--------------------------------------------------------------------------------------------------------------------------------------------------------------------------------------------------|--------------|--------------|
| 1  | <chem>COc1cc(cc(c1OC)OC)Cc1cnc(nc1N)N</chem>                                                                                                                                                     | 1.9          | 1.4          |
| 2  | <chem>CC(C)NCC(COC1CCCC2C1CCCC2)O</chem>                                                                                                                                                         | 1.1          | 0.9          |
| 3  | <chem>COc1cc2c(cc1OCCCN1CCOCC1)c(nen2)Nc1ccc(c(c1)Cl)F</chem>                                                                                                                                    | 1.2          | 1.1          |
| 4  | <chem>CC[N+](C)(CC)CCOC(=O)C(c1ccccc1)(C1CCCC1)O</chem>                                                                                                                                          | 25.2         | 14.3         |
| 5  | <chem>CN1CCN(CC1)C1=Ne2ccc(ccc2N2c1ccccc2)Cl</chem>                                                                                                                                              | 1            | 1.1          |
| 6  | <chem>c1(c(nc(c(n1)Cl)N)N)C(=O)NC(=N)N</chem>                                                                                                                                                    | 75.7         | 73.9         |
| 7  | <chem>C[N+](C1CCCC1)OC(=O)C(c1ccccc1)(c1ccccc1)O)C</chem>                                                                                                                                        | 76.2         | 0            |
| 8  | <chem>CC[C@@H]1[C@@]([C@@H]([C@H](N(C[C@@H](C[C@@]([C@@H]([C@H]([C@@H]([C@H](C(=O)O1)C)O[C@H]1C[C@@]([C@H]([C@@H](O1)C)O)(C)OC)C)O[C@H]1[C@@H]([C@H](C[C@@H](O1)C)N(C)C)O)(C)O)C)C)O)(C)O</chem> | 1.1          | 0.8          |
| 9  | <chem>c1cc(ccc1C(=O)CCCN1CCC(CC1)(c1ccc(cc1)Cl)O)F</chem>                                                                                                                                        | 1.2          | 1.1          |
| 10 | <chem>CC(C)C(CCCN(C)CCc1ccc(c(c1)OC)OC)(C#N)c1ccc(c(c1)OC)OC</chem>                                                                                                                              | 1.2          | 1.2          |
| 11 | <chem>Cc1ccc(cc1Nc1cccc(n1)c1cccn1)NC(=O)c1ccc(cc1)CN1CCN(CC1)C</chem>                                                                                                                           | 1.1          | 1.1          |
| 12 | <chem>CCN(CC)CCNC(=O)c1cc(c(cc1OC)N)Cl</chem>                                                                                                                                                    | 1.8          | 1.3          |
| 13 | <chem>CC(C)N(CCC(c1ccccc1)(c1cccn1)C(=O)N)C(C)C</chem>                                                                                                                                           | 1.7          | 0.9          |
| 14 | <chem>CC(C)(C)NCC(c1ccc(c(c1)CO)O)O</chem>                                                                                                                                                       | 6.5          | 14.6         |
| 15 | <chem>CN(C)CCCN1c2ccccc2CCc2c1ccccc2</chem>                                                                                                                                                      | 1.1          | 1.2          |
| 16 | <chem>c1ccc(cc1)n1c(ccn1)NS(=O)(=O)c1ccc(cc1)N</chem>                                                                                                                                            | 1.1          | 0.8          |
| 17 | <chem>CCCCc1c(c2ccccc2o1)C(=O)c1cc(c(c(c1)I)OCCN(CC)CC)I</chem>                                                                                                                                  | 1.2          | 1.4          |
| 18 | <chem>CC(Cc1ccc(cc1)O)NCC(c1cc(cc(c1)O)O)O</chem>                                                                                                                                                | 17.5         | 11.8         |
| 19 | <chem>CC(=O)O[C@@H]1[C@@H](Sc2ccccc2N(C1=O)CCN(C)C)c1ccc(c(c1)OC</chem>                                                                                                                          | 1.3          | 1.1          |

|    |                                                                          |      |      |
|----|--------------------------------------------------------------------------|------|------|
| 20 | CN(C)C(=O)C(CCN1CCC(CC1)(c1ccc(cc1)Cl)O)(c1ccccc1)c1ccccc1               | 1.1  | 0.9  |
| 21 | CCN(CC)CCNC(=O)c1ccc(cc1)N                                               | 2.5  | 1.6  |
| 22 | c1ccc(cc1)CNC(=N)NC(=O)c1c(nc(c(n1)Cl)N)N                                | 1.8  | 1.3  |
| 23 | C(O)(c1ccnc2c1cc(cc2)OC)C1N2CC(C(C1)CC2)C=C                              | 1.2  | 1.1  |
| 24 | CN/C(=C/[N+](=O)[O-])/NCCSCc1ccc(o1)CN(C)C                               | 18.1 | 1.6  |
| 25 | CNS(=O)(=O)Cc1ccc2c(c1)c(en2)CCN(C)C                                     | 14.6 | 3.3  |
| 26 | C[N+]12CCC(CC1)C(C2)OC(=O)C(c1ccccc1)(c1ccccc1)O                         | 56.5 | 0    |
| 27 | COc1cc2c(cc1OC)nc(nc2N)N1CCN(CC1)C(=O)C1CCCO1                            | 1.3  | 1.3  |
| 28 | CC(C)[C@H]1c2ccc(cc2CC[C@@]1(CC(N)C)CCc1nc2ccccc2n1)OC(=O)COC)F          | 1.1  | 1.1  |
| 29 | CN(C)C(=O)COC(=O)Cc1ccc(cc1)OC(=O)c1ccc(cc1)NC(=N)N                      | 1.7  | 1    |
| 30 | C[C@H](Cc1ccc(cc1)OC)NC[C@@H](c1ccc(c(c1)NC=O)O)O                        | 3    | 1.1  |
| 31 | c1cc(cnc1)C(=O)Nc1cc(cc2c1nc1c2ccnc1)Cl                                  | 1    | 0    |
| 32 | CCS(=O)(=O)c1ccc(cc1)c1cc(c(s1)NC(=O)N)C(=O)N                            | 4.5  | 0    |
| 33 | CC(=O)Nc1cc(c(cc1OC[C@](C)(CNC1CCN(CC1)Cc1ccc(cc1)Cl)O)O)Cl              | 1.1  | 0    |
| 34 | c1cc(ccc1O)OC[C@@H](CNCCNC(=O)N1CCOCC1)O                                 | 38.5 | 1.7  |
| 35 | c1cc(ccc1O)OC[C@H](CNCCNC(=O)N1CCOCC1)O                                  | 46.8 | 1.4  |
| 36 | CC(C)NC[C@@H](COc1ccc(cc1)CC(=O)N)O                                      | 4.7  | 2.5  |
| 37 | CN1[C@@H]2CC[C@H]1C[C@H](C2)OC(=O)C(CO)c1ccccc1                          | 1.7  | 1.7  |
| 38 | CN1C2CC(CC1CC2)OC(=O)C(c1ccccc1)CO                                       | 1.6  | 1.4  |
| 39 | Cc1c(cc(c(=O)n1c1ccccc1)C(F)(F)F)C(=O)NCc1ccc(cc1)S(=O)(=O)C(C)N1CCOCC1  | 1.2  | 2    |
| 40 | CC(C)NC[C@H](COc1ccc(cc1)CC(=O)N)O                                       | 4.6  | 2.7  |
| 41 | C[N+]1(CCC(C1)OC(=O)C(c1ccccc1)(C1CCCC1)O)C                              | 59.1 | 93   |
| 42 | CCc1cc2c(cc1CC)CC(C2)NC[C@@H](c1ccc(c2c1ccc(=O)n2)O)O                    | 1.4  | 0.9  |
| 43 | c1ccc(c(c1)c1cc(c(s1)NC(=O)N)C(=O)N)O[C@H]1CCNC1                         | 25.9 | 1.9  |
| 44 | CC1(Cc2c(cccc2O1)CN1CCC2(CC1)CCN(CC2)C(=O)c1ccnc(c1)N)C                  | 1    | 0    |
| 45 | CN/C(=C/[N+](=O)[O-])/NCCSCc1csc(n1)CN(C)C                               | 3.1  | 1.1  |
| 46 | C[N+]1([C@@H]2C[C@H](C[C@H]1[C@H]1[C@@H]2O1)OC(=O)C(c1cccs1)(c1cccs1)O)C | 65.5 | 39.2 |
| 47 | CN1[C@@H]2CC(C[C@H]1[C@H]1[C@@H]2O1)OC(=O)[C@H](CO)c1ccccc1              | 1.1  | 0    |
| 48 | c1ccc(cc1)C1CCN(CC1)[C@@H]1CCCC[C@H]1O                                   | 1    | 0    |
| 49 | CC[C@@H]([C@@H](c1ccc(c2c1ccc(=O)n2)O)O)NC(C)C                           | 10.7 | 1.9  |
| 50 | c1cc(c(cc1C#N)c1cc(c(s1)NC(=O)N)C(=O)N)OC1CCNC1                          | 38.6 | 1.6  |
| 51 | c1ccc(c(c1)c1cc(c(s1)NC(=O)N)C(=O)N)OC1CNC1                              | 11.4 | 2.2  |
| 52 | c1cc(c(c(c1)OCC1CC1)c1cc(c2c(n1)NC(=O)OC2)[C@@H]1CCCNC1)O                | 1.1  | 1    |
| 53 | c1ccc(c(c1)c1cc(c(s1)NC(=O)N)C(=O)N)OCCN                                 | 13.9 | 2.7  |
| 54 | c1cc(cc(c1)OC1CCNC1)c1cc(c(s1)NC(=O)N)C(=O)N                             | 68   | 1.6  |
| 55 | c1cc(ccc1c1cc(c(s1)NC(=O)N)C(=O)N)OCCN                                   | 69.1 | 1.3  |
| 56 | Cc1c(nc(c(=O)n1c1ccccc1)C(F)(F)F)CCCN)c1ccn1c1ccc(cc1)C#N                | 1.3  | 0    |
| 57 | c1ccc(c(c1)c1cc(c(s1)NC(=O)N)C(=O)N)OCC(CNCCO)O                          | 6.5  | 0    |
| 58 | CC(C)NCC(COc1ccccc1c1cc(c(s1)NC(=O)N)C(=O)N)O                            | 3.1  | 0    |
| 59 | c1ccc(c(c1)c1cc(c(s1)NC(=O)N)C(=O)N)OCC(CNC1CCC1)O                       | 2.9  | 0    |

|    |                                                                                                                        |      |     |
|----|------------------------------------------------------------------------------------------------------------------------|------|-----|
| 60 | <chem>c1ccc(c(c1)c1cc(c(s1)NC(=O)N)C(=O)N)OCC(CN)O</chem>                                                              | 5.3  | 0   |
| 61 | <chem>CNCC(COe1cccc1c1cc(c(s1)NC(=O)N)C(=O)N)O</chem>                                                                  | 14.6 | 0   |
| 62 | <chem>CC1CCN(CC1)CC(=O)N[C@H]1CC[C@H](CC1)n1c(=O)n(c2ncc(cc2c1=O)F)C1CCSCC1</chem>                                     | 1.1  | 0   |
| 63 | <chem>COe1ccc(cc1)C(NCc1cccc1)C(=O)N[C@H]1CC[C@H](CC1)n1c(=O)n(c2ncc(cc2c1=O)F)C1CCSCC1</chem>                         | 1.2  | 0   |
| 64 | <chem>C[N+](C)(C)CC(COe1cccc1c1cc(c(s1)NC(=O)N)C(=O)N)C</chem>                                                         | 52.7 | 4.3 |
| 65 | <chem>c1ccc(c(c1)c1nc(c(s1)NC(=O)N)C(=O)N)OC1CCNC1</chem>                                                              | 21.5 | 0   |
| 66 | <chem>C[N+](C)(C)CC(COe1cccc1c1cc(c(s1)NC(=O)N)C(=O)N)O</chem>                                                         | 23.5 | 0   |
| 67 | <chem>CNc1nccc(n1)c1cc2cc(ccc2n1)C(=O)NC(CN(c1cccc1)c1cccn1)C(=O)OC</chem>                                             | 1    | 0   |
| 68 | <chem>CC(CNC1CC1)(COe1cccc1c1cc(c(s1)NC(=O)N)C(=O)N)O</chem>                                                           | 1.4  | 0   |
| 69 | <chem>c1ccc(c(c1)c1cc(c(s1)NC(=O)N)C(=O)N)OC[C@H](CNC1CC1)O</chem>                                                     | 3.5  | 0   |
| 70 | <chem>c1ccc(c(c1)c1nc(c(s1)NC(=O)N)C(=O)N)OCCN</chem>                                                                  | 12.7 | 1.3 |
| 71 | <chem>COCCN1CC[C@@H](C1)Oe1cccc1c1cc(c(s1)NC(=O)N)C(=O)N</chem>                                                        | 1.9  | 0   |
| 72 | <chem>CNc1nccc(n1)c1cc2cc(ccc2n1)C(=O)NC(CN(c1cccc1)c1cccn1)C(=O)O</chem>                                              | 1.4  | 0   |
| 73 | <chem>c1ccc(c(c1)c1cc2c(s1)c(cnc2N)C(=O)N)OC1CCNC1</chem>                                                              | 11.3 | 0   |
| 74 | <chem>C[N+](C)(C)CC(C1)C1cc(nc(c1C#N)N)c1c(ccc1OCC1CC1)O)C</chem>                                                      | 12.6 | 5.4 |
| 75 | <chem>CC(C)NC(=O)Nc1nc(c(s1)NC(=O)N)C(=O)N</chem>                                                                      | 10.7 | 0   |
| 76 | <chem>c1ccc(c(c1)c1nc(c(s1)NC(=O)N)C(=O)N)OCCCN</chem>                                                                 | 13.9 | 1.5 |
| 77 | <chem>Cc1c(cc(c(=O)n1c1cccc(c1)C(F)(F)F)C(=O)NCCCN(C)C)c1ccn1c1ccc(cc1)C#N</chem>                                      | 1.3  | 0   |
| 78 | <chem>C[N+](C)(C)CC(C1)C1cc(nc2c1COC(=O)N2)c1c(ccc1OCC1CC1)O)C</chem>                                                  | 3.7  | 1.9 |
| 79 | <chem>Cc1c(cc(c(=O)n1c1cccc(c1)C(F)(F)F)C(=O)NCCCN(C)C)c1ccn1c1ccc(cc1)C#N</chem>                                      | 1.2  | 0   |
| 80 | <chem>CNC1CCN(CC1)Cc1c(ccc(c1)O)c1cc(ccc1)n1c(=O)n(c(=O)c2c1ncc(c2)F)[C@H]1CC[C@H](CC1)NC(=O)c1nc2n(c1)cc(cc2)F</chem> | 1.1  | 0   |
| 81 | <chem>c1cc(cc(c1)c1c(cc(cc1)O)CN1CCNCC1)n1c(=O)n(c(=O)c2c1ncc(c2)F)[C@H]1CC[C@H](CC1)NC(=O)c1nc2n(c1)cc(cc2)F</chem>   | 1.1  | 0   |
| 82 | <chem>C[N+](C)(C)CC(C1)C1cc(nc(c1C#N)N)c1c(ccc1OCC1CC1)O)C</chem>                                                      | 14.8 | 2.5 |
| 83 | <chem>C[N+](C)(C)CC(C1)C1cc(nc(c1C#N)N)c1c(ccc1OCC1CC1)O)C</chem>                                                      | 23.4 | 7.2 |
| 84 | <chem>c1nc2cc3c(cc2n1)C1CC3CNC1</chem>                                                                                 | 1.6  | 1.6 |
| 85 | <chem>c1cc(c(cc1O)O)c1cc(c(s1)NC(=O)N)C(=O)N</chem>                                                                    | 13.4 | 0   |
| 86 | <chem>c1ccc(c(c1)c1cc(c(s1)C(=O)N)NC(=O)N)O</chem>                                                                     | 1.4  | 0   |
| 87 | <chem>COe1ccc(c(c1)O)c1cc(c(s1)NC(=O)N)C(=O)N</chem>                                                                   | 6.7  | 0   |
| 88 | <chem>COC(=O)[C@@H]1CC(CN1)Oe1cccc1c1cc(c(s1)NC(=O)N)C(=O)N</chem>                                                     | 1.4  | 0   |
| 89 | <chem>CC(C)(C)OC(=O)N1CC[C@@H](C1)COe1cccc1c1cc(c(s1)NC(=O)N)C(=O)N</chem>                                             | 1.1  | 0   |
| 90 | <chem>CCN(CC)C(=O)c1ccc(c(c1)OC)c1cc(c(s1)NC(=O)N)C(=O)N</chem>                                                        | 3    | 0   |
| 91 | <chem>c1ccc(c(c1)c1cc(c(s1)NC(=O)N)C(=O)N)OC[C@H]1CCNC1</chem>                                                         | 16.7 | 0   |
| 92 | <chem>COe1ccc(ccc1c1cc(c(s1)NC(=O)N)C(=O)N)C(F)(F)F</chem>                                                             | 1.1  | 0   |
| 93 | <chem>COC(=O)c1ccc(c(c1)O)c1cc(c(s1)NC(=O)N)C(=O)N</chem>                                                              | 6.6  | 0   |
| 94 | <chem>c1c(cc(c(c1c1cc(c(s1)NC(=O)N)C(=O)N)O[C@H]1CCNC1)Br)F</chem>                                                     | 3    | 0   |
| 95 | <chem>c1ccc(c(c1)c1cc(c(s1)NC(=O)N)C(=O)N)O[C@H]1C[C@H](NC1)CO</chem>                                                  | 5.2  | 0   |
| 96 | <chem>c1cc(c(cc1Cl)c1cc(c(s1)NC(=O)N)C(=O)N)O[C@H]1CCNC1</chem>                                                        | 9.1  | 0   |

|     |                                                                                                                     |      |      |
|-----|---------------------------------------------------------------------------------------------------------------------|------|------|
| 97  | CCNC(=O)[C@@H]1[C@H]([C@H]([C@@H](O1)N1C=N[C]2#[C]1[N]C([N]C2N)NCCc1ccc(cc1)CCN)O)O                                 | 1    | 0.8  |
| 98  | CS(=O)(=O)N1CCC(=CC1)c1cc(c(s1)NC(=O)N)C(=O)N                                                                       | 6.6  | 0    |
| 99  | CC1(CN([C@@H](CO1)C(=O)Nc1cc(cc2c1nc1c2ccnc1)Cl)CC(=O)N1CCCC1)C                                                     | 1    | 1.1  |
| 100 | Cc1c(c(on1)C)S(=O)(=O)N1CCC(=CC1)c1cc(c(s1)NC(=O)N)C(=O)N                                                           | 1.2  | 1    |
| 101 | CN(C)C(=O)[C@@H]1C[C@@H](CN1)Oc1cccc1c1cc(c(s1)NC(=O)N)C(=O)N                                                       | 2    | 1.4  |
| 102 | Cc1cc(c(cc1)O)C(=O)N[C@H]1CC[C@H](CC1)NC(=O)c1c(ncc(c1)F)Oc1cc(ccc1)c1c(cc(cc1)CN1C[C@@H](N[C@@H](C1)C)C)CN1C COCC1 | 1.1  | 1.2  |
| 103 | c1cc(cc(c1)n1c(c(cc(c1=O)C(=O)N)c1ccn1c1ccc(cc1)C#N)CN)C(F)(F)F                                                     | 1    | 1.2  |
| 104 | C[C@@H]1CN(C[C@@H](O1)C)C(=O)CN1CC(OC[C@H]1C(=O)Nc1cc(cc2c1nc1c2ccnc1)Cl)(C)C                                       | 1.1  | 0    |
| 105 | Cc1cccc1C[C@@H](CNC(=O)c1c(nc(c(n1)Cl)N)N)NC(=N)C                                                                   | 20.6 | 1.9  |
| 106 | c1ccc(c(c1)c1cc(c(s1)NC(=O)N)C(=O)N)O[C@H]1C[C@H](NC1)C F                                                           | 1.9  | 0    |
| 107 | COC[C@@H]1C[C@@H](CN1)Oc1cccc1c1cc(c(s1)NC(=O)N)C(=O)N                                                              | 2.5  | 0    |
| 108 | CCC(CC)Nc1c2c(nc(n1)NCCNC(=O)Nc1cncnc1)n(cn2)[C@H]1[C@@H]([C@@H]([C@H](O1)C(=O)NCC)O)O                              | 1    | 1.3  |
| 109 | CC(C)NCC(COc1ccc(cc1)CC(=O)N)O                                                                                      | 8.1  | 4.9  |
| 110 | c1cc(c(c(c1)Cl)N=C1NCCN1)Cl                                                                                         | 1.2  | 1    |
| 111 | CC(C)NCC(COc1cccc1OCC=C)O                                                                                           | 1.1  | 0    |
| 112 | c1ccc(cc1)c1c(nc2c(n1)c(nc(n2)N)N)N                                                                                 | 1.5  | 1.6  |
| 113 | c1ccc2c(c1)N(c1cc(ccc1S2)Cl)CCCN1CCN(CC1)CCO                                                                        | 1.8  | 1.2  |
| 114 | CNC1(CCCCC1=O)c1cccc1Cl                                                                                             | 1.1  | 1.1  |
| 115 | CC(C)(C)NCC(c1cc(cc(c1)O)O)O                                                                                        | 7.3  | 6.9  |
| 116 | c1cc(ccc1c1cc(c(s1)NC(=O)N)C(=O)N)Cl                                                                                | 1.2  | 0    |
| 117 | CNCCOc1cccc1c1cc(c(s1)NC(=O)N)C(=O)N                                                                                | 11.3 | 0    |
| 118 | Cc1c(ncn1)CSCC/N=C(/NC)NC#N                                                                                         | 4    | 14.7 |
| 119 | CCCNCC(COc1cccc1C(=O)CCc1cccc1)O                                                                                    | 1.1  | 1.1  |
| 120 | COc1cc(c(c1)OC)C(=O)CCCN1CCCC1)OC                                                                                   | 1    | 0    |
| 121 | c1ccc(cc1)CCCCOCCCCCNCC(c1ccc(c(c1)CO)O)O                                                                           | 1    | 0.8  |
| 122 | CN(CCOc1cccc1c1cc(c(s1)NC(=O)N)C(=O)N)CC=C                                                                          | 1.1  | 0    |
| 123 | c1cc(c(c(c1)OCC1CC1)c1cc(c(c(n1)N)C#N)C1CCNC1)O                                                                     | 1    | 0    |
| 124 | CC(C)[N+]1([C@@H]2CC[C@H]1C[C@H](C2)OC(=O)C(CO)c1ccc(cc1)C                                                          | 41.9 | 8.3  |
| 125 | CC(C)NC[C@@H](COc1cccc2c1ccn2)O                                                                                     | 1.2  | 1.3  |
| 126 | C[C@H](Cc1cccc1)N(C)CC#C                                                                                            | 1.1  | 1.9  |
| 127 | CC(=O)O[C@H]1[C@@H](CN[C@H]1Cc1ccc(cc1)OC)O                                                                         | 1    | 0.8  |
| 128 | c1ccc(c(c1)c1cc(c(s1)NC(=O)N)C(=O)N)O[C@@H]1CCNC1                                                                   | 15.5 | 1.1  |
| 129 | c1ccc(c(c1)c1cc(c(s1)NC(=O)N)C(=O)N)OC1CCNCC1                                                                       | 17   | 1.8  |
| 130 | CC(C(=O)N)Oc1cccc1c1cc(c(s1)NC(=O)N)C(=O)N                                                                          | 8.4  | 1.7  |
| 131 | c1ccc(c(c1)c1cc(c(s1)NC(=O)N)C(=O)N)OCCCN                                                                           | 6.8  | 1.4  |
| 132 | CCOCCNCC(COc1cccc1c1cc(c(s1)NC(=O)N)C(=O)N)O                                                                        | 5.1  | 1.3  |

|     |                                                                                                             |       |      |
|-----|-------------------------------------------------------------------------------------------------------------|-------|------|
| 133 | <chem>c1ccc(c(c1)c1cc(c(s1)NC(=O)N)C(=O)N)OCC1CCCNC1</chem>                                                 | 5.3   | 2.1  |
| 134 | <chem>c1cc(ccc1c1cc(c(s1)NC(=O)N)C(=O)N)OC1CCNC1</chem>                                                     | 73.1  | 1.4  |
| 135 | <chem>c1ccc(c(c1)c1cc(c(s1)NC(=O)N)C(=O)N)OCC(CNC1CC1)O</chem>                                              | 2.7   | 1.2  |
| 136 | <chem>c1cc(ccc1c1cc(c(s1)NC(=O)N)C(=O)N)OCC(=O)N</chem>                                                     | 16.1  | 1    |
| 137 | <chem>c1cc(cc(c1)OCC(=O)N)c1cc(c(s1)NC(=O)N)C(=O)N</chem>                                                   | 6.5   | 0    |
| 138 | <chem>CCC(C)NCC(COc1ccccc1c1cc(c(s1)NC(=O)N)C(=O)N)O</chem>                                                 | 3.6   | 0    |
| 139 | <chem>CCNCC(COc1ccccc1c1cc(c(s1)NC(=O)N)C(=O)N)O</chem>                                                     | 7.2   | 0    |
| 140 | <chem>CCOC(=O)Nc1nc(c(s1)NC(=O)N)C(=O)N</chem>                                                              | 1.4   | 1.1  |
| 141 | <chem>c1ccc(c(c1)c1cc(c(s1)NC(=O)N)C(=O)N)OC[C@H](CNCCO)O</chem>                                            | 7.8   | 0.9  |
| 142 | <chem>CC(C)NC[C@@H](COc1ccccc1c1cc(c(s1)NC(=O)N)C(=O)N)O</chem>                                             | 4.5   | 1.1  |
| 143 | <chem>COCCN1CC[C@H](C1)Oc1ccccc1c1cc(c(s1)NC(=O)N)C(=O)N</chem>                                             | 1.9   | 0.9  |
| 144 | <chem>CC(C)(C)OC(=O)N1CC[C@H](C1)COc1ccccc1c1cc(c(s1)NC(=O)N)C(=O)N</chem>                                  | 1.1   | 0    |
| 145 | <chem>c1ccc(c(c1)c1cc(c(s1)NC(=O)N)C(=O)N)OC1CCCNCC1</chem>                                                 | 12.5  | 0    |
| 146 | <chem>c1ccc(c(c1)c1cc(c(s1)NC(=O)N)C(=O)N)OC[C@@H]1CCNC1</chem>                                             | 11.3  | 0    |
| 147 | <chem>c1ccc(cc1)COc1cc(ccc1c1cc(c(s1)NC(=O)N)C(=O)N)OCC(=O)N</chem>                                         | 3.4   | 0    |
| 148 | <chem>CN1CCC(C1)COc1ccccc1c1cc(c(s1)NC(=O)N)C(=O)N</chem>                                                   | 4.6   | 0    |
| 149 | <chem>Cc1ccc(c1O[C@H]1CCNC1)c1cc(c(s1)NC(=O)N)C(=O)N</chem>                                                 | 33.7  | 0    |
| 150 | <chem>Cc1ccc(c1O[C@@H]1CCNC1)c1cc(c(s1)NC(=O)N)C(=O)N</chem>                                                | 37    | 0    |
| 151 | <chem>c1cc(c(cc1F)c1cc(c(s1)NC(=O)N)C(=O)N)O[C@H]1CCNC1</chem>                                              | 10    | 0    |
| 152 | <chem>C[C@H](COc1ccccc1c1cc(c(s1)NC(=O)N)C(=O)N)N</chem>                                                    | 8.6   | 0    |
| 153 | <chem>CC(C)NC(C)COc1ccccc1c1cc(c(s1)NC(=O)N)C(=O)N</chem>                                                   | 3.4   | 0    |
| 154 | <chem>c1cc(c(cc1)OC1CCC(CC1)N)c1sc(c(c1)C(=O)N)NC(=O)N</chem>                                               | 8     | 0    |
| 155 | <chem>CC(C)(C)OC(=O)N1CCC(=CC1)c1cc(c(s1)NC(=O)N)C(=O)N</chem>                                              | 1.1   | 0    |
| 156 | <chem>CCS(=O)(=O)N1CCC(=CC1)c1cc(c(s1)NC(=O)N)C(=O)N</chem>                                                 | 7.1   | 2.4  |
| 157 | <chem>CN(C)C(=N)NC(=N)N</chem>                                                                              | 1.7   | 15.5 |
| 158 | <chem>c1ccc(cc1)CCNC(=N)NC(=N)N</chem>                                                                      | 39.3  | 35.1 |
| 159 | <chem>C[N+]1([C@@H]2[C@H](C[C@H]1[C@H]1[C@@H]2O1)OC(=O)C(c1cces1)(c1cces1)O)C</chem>                        | 125.3 | 39.1 |
| 160 | <chem>CN1CCN(CC1)CCCN1c2ccccc2Sc2c1cc(cc2)Cl</chem>                                                         | 0.8   | 0.9  |
| 161 | <chem>C(CN1c2ccccc2Sc2c1cccc2)(N(C)C)c1ccccc1</chem>                                                        | 0.9   | 1    |
| 162 | <chem>CNCCCN1c2ccccc2CCc2c1cccc2</chem>                                                                     | 0.8   | 1.2  |
| 163 | <chem>c1ccc2c(c1)N(c1cc(ccc1S2)C(F)(F)F)CCCN1CCN(CC1)CCO</chem>                                             | 0.9   | 0.7  |
| 164 | <chem>CC12CC3CC(C1)(CC(C3)(C2)N)C</chem>                                                                    | 1.1   | 1    |
| 165 | <chem>CN(C)CCCN1c2ccccc2CCc2c1cc(cc2)Cl</chem>                                                              | 0.8   | 1.2  |
| 166 | <chem>CCCN1CCCCC1C(=O)Nc1c(ccc1C)C</chem>                                                                   | 0.8   | 1.4  |
| 167 | <chem>CN1CCc2ccccc3c2C1Cc1c3c(c(cc1)O)O</chem>                                                              | 0.5   | 1.7  |
| 168 | <chem>COc1cc2c(cc1OC)nc(nc2N)N1CCN(CC1)C(=O)c1ccco1</chem>                                                  | 0.9   | 1.3  |
| 169 | <chem>CC1CN(C(=O)[N]C1=O)C1CC(C(O1)CO)N=[N+]=[N-]</chem>                                                    | 0.9   | 0.7  |
| 170 | <chem>CC(C(=O)c1ccccc1)Cl)NC(C)(C)C</chem>                                                                  | 0.9   | 1.4  |
| 171 | <chem>COc1ccccc1CNCCCCCNCCCCCNCCCCCNCCc1ccccc1OC</chem>                                                     | 0.9   | 1.2  |
| 172 | <chem>c1ccc(cc1)NC(=N)NC(=O)c1c(nc(c(n1)Cl)N)N</chem>                                                       | 1     | 1.4  |
| 173 | <chem>CCN1C[C@@]2(CCC(C34[C@@H]1C(CC23)[C@]1(C[C@@H]([C@H]2CC4[C@@]1(C2OC)O)OC)OC(=O)c1ccccc1NC(=O)C</chem> | 0.8   | 1.3  |
| 174 | <chem>CC(C)(C(=O)N[C@H](COc1ccccc1)C(=O)N1CCC2(CC1)CN(c1c2ccccc1)S(=O)(=O)C)N</chem>                        | 0.8   | 1    |

|     |                                                                                                         |     |     |
|-----|---------------------------------------------------------------------------------------------------------|-----|-----|
| 175 | CN(C)c1c2c(ncn1)n(cn2)[C@H]1[C@@H]([C@@H]([C@H](O1)CO)NC(=O)[C@H](Cc1ccc(cc1)OC)N)O                     | 1   | 1.1 |
| 176 | CN(C)CC/C=C\1/c2ccccc2Sc2c1cc(cc2)Cl                                                                    | 0.3 | 1.7 |
| 177 | CC(=O)O[C@@H]1[C@H](CN[C@@H]1Cc1ccc(cc1)OC)O                                                            | 0.8 | 1   |
| 178 | Cc1c(nc(c(=O)n1c1ccc(c1)C(F)(F)F)C(=O)NC)c1ccn1c1ccc(cc1)C#N                                            | 0   | 1.1 |
| 179 | CC(C)(C(=O)N[C@H](COCc1ccccc1)C(=O)N1CCC2=NN(C(=O)[C@@]2(C1)Cc1ccccc1)C)N                               | 0.8 | 1.1 |
| 180 | c1cc2n(cc(n2)CN[C@H]2CC[C@H](CC2)n2c(=O)n(c3ncc(cc3c2=O)F)C2CCSCC2)cc1                                  | 1   | 0   |
| 181 | Cc1c(cc(c(=O)n1c1ccc(c1)C(F)(F)F)C(=O)NCCC[N+](C)(C)C)c1ccn1c1ccc(cc1)C#N                               | 0.7 | 1   |
| 182 | Cc1scc(n1)C(=O)N[C@H]1CC[C@H](CC1)n1c(=O)n(c2ncc(cc2c1=O)F)c1cc(ccc1)c1ccc(cc1)CCCN1CCNCC1              | 0   | 0.9 |
| 183 | CC(C)(c1ccccc1)C(c1ccccc1F)N                                                                            | 0.9 | 1   |
| 184 | c1c(c(sc1C1=CCCC1)NC(=O)N)C(=O)N                                                                        | 1   | 0   |
| 185 | CCNC(=O)[C@@H]1[C@H]([C@H]([C@@H](O1)n1cnc2c1nc(nc2N)NCCc1ccc(cc1)CC[N+](C)(C)C)O)O                     | 1.2 | 1.3 |
| 186 | CC[C@@]1(C(=O)NC(=O)N1)CS(=O)(=O)N1CCC(=CC1)c1cc(c(s1)NC(=O)N)C(=O)N                                    | 0.7 | 0.4 |
| 187 | CCNC(=O)[C@@H]1[C@H]([C@H]([C@@H](O1)n1cnc2c1nc(nc2N)C(=O)NCCNC(=O)Nc1ccccc1)O)O                        | 0.9 | 0.9 |
| 188 | CCNC(=O)[C@@H]1[C@H]([C@H]([C@@H](O1)n1cnc2c1nc(nc2N)NCCNC(=O)Nc1ccccc1)O)O                             | 0.8 | 0.6 |
| 189 | CCNC(=O)[C@@H]1[C@H]([C@H]([C@@H](O1)n1cnc2c1nc(nc2N)NCCNC(=O)Nc1cc[n+](cc1)C)O)O                       | 1.2 | 1.2 |
| 190 | CCNC(=O)[C@@H]1[C@H]([C@H]([C@@H](O1)n1cnc2c1nc(nc2N)C(=O)NCCNC(=O)Nc1cc[n+](cc1)C)O)O                  | 1.6 | 1.3 |
| 191 | Cc1n(nc(c1)C(=O)N[C@H]1CC[C@H](CC1)NC(=O)c1c(ncc(c1)F)O)c1cc(ccc1)c1ccc(cc1)CCCN1C[C@@H](N[C@@H](C1)C)C | 1   | 1.1 |
| 192 | c1cc(ccc1C[C@@H](C#N)NC(=O)C1(CCOCC1)N)c1ccc(cc1)C#N                                                    | 0   | 1   |
| 193 | c1cc(cc(c1)n1c(=O)ccc(c1CN)c1ccn1c1ccc(cc1)C#N)C(F)(F)F                                                 | 0.9 | 1.3 |
| 194 | CCC(CC)Nc1c2c(nc(n1)NCCNC(=O)Nc1cc[n+](cc1)C)n(cn2)[C@H]1[C@@H]([C@@H]([C@H](O1)C(=O)NCC)O)O            | 0.8 | 0.8 |
| 195 | B1(c2ccccc2[C@H](O1)CN)O                                                                                | 1.2 | 1.1 |
| 196 | B1(c2c(cccc2OCCCO)[C@H](O1)CN)O                                                                         | 1   | 1.2 |

**Supplementary Table 1A:** Table showing total number of Substrates (S) and Non-substrates (NS) in Monte Carlo Optimization and Bayesian Classification.

| hOCT1                            |                |               |                    |               |               |          |               |               |
|----------------------------------|----------------|---------------|--------------------|---------------|---------------|----------|---------------|---------------|
|                                  | Total          | Training      | Invisible training | Calibration   | Validation    |          | Training set  | Test set      |
| Monte Carlo Optimization Split 1 | S-104<br>NS-85 | S-40<br>NS-26 | S-40<br>NS-26      | S-21<br>NS-8  | S-3<br>NS-25  | Bayesian | S-91<br>NS-60 | S-13<br>NS-25 |
| Monte Carlo Optimization Split 2 |                | S-36<br>NS-30 | S-38<br>NS-30      | S-14<br>NS-13 | S-16<br>NS-12 |          |               |               |
| Monte Carlo Optimization Split 3 |                | S-29<br>NS-37 | S-41<br>NS-25      | S-17<br>NS-11 | S-17<br>NS-12 |          |               |               |
| Combined (hOCT1 and hOCT2)       |                |               |                    |               |               |          |               |               |
|                                  | Training set   |               |                    |               |               |          | Test set      |               |
| Bayesian                         | S-34<br>NS-63  |               |                    |               |               |          | S-8<br>NS-16  |               |

**Supplementary Table 2.** Occurrence (appearance count as well as  $p$ -values of respective distribution) of functional groups in substrate or non-substrate in case of hOCT1. Positive and negative  $p$ -values signify the presence of specific group (s) in substrate and non-substrate sets respectively.

| No | Structure                                                                              | Substrate    | Non-substrate | $p$ -Value             |
|----|----------------------------------------------------------------------------------------|--------------|---------------|------------------------|
| 1  | 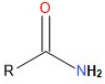    | 59 (56.73 %) | 9 (10.59 %)   | $1.65 \times 10^{-13}$ |
| 2  |     | 65 (62.5 %)  | 16 (18.82 %)  | $7.98 \times 10^{-12}$ |
| 3  |     | 53 (50.96 %) | 8 (9.41 %)    | $1.06 \times 10^{-11}$ |
| 4  | HS  | 52 (50 %)    | 8 (9.411 %)   | $2.62 \times 10^{-11}$ |
| 5  | HS  | 53 (50.96 %) | 9 (10.59 %)   | $4.83 \times 10^{-11}$ |

|    |                                                                                           |              |              |                         |
|----|-------------------------------------------------------------------------------------------|--------------|--------------|-------------------------|
| 6  | HS<br>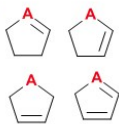   | 53 (50.96 %) | 9 (10.59 %)  | $4.83 \times 10^{-11}$  |
| 7  | LS<br>   | 54 (51.92 %) | 10 (11.76 %) | $8.35 \times 10^{-11}$  |
| 8  |          | 58 (55.77 %) | 13 (15.29 %) | $1.31 \times 10^{-10}$  |
| 9  |          | 59 (56.73 %) | 14 (16.47 %) | $1.88 \times 10^{-10}$  |
| 10 | LS<br>   | 56 (53.85 %) | 15 (17.65 %) | $7.76 \times 10^{-09}$  |
| 11 |        | 11 (10.58 %) | 41 (48.24 %) | $-3.61 \times 10^{-08}$ |
| 12 |        | 12 (11.54 %) | 41 (48.24 %) | $-1.07 \times 10^{-07}$ |
| 13 | LS<br> | 25 (24.04 %) | 55 (64.71 %) | $-1.34 \times 10^{-07}$ |
| 14 | HS<br> | 16 (15.38 %) | 45 (52.94 %) | $-2.16 \times 10^{-07}$ |
| 15 |        | 59 (56.73 %) | 21 (24.71 %) | $3.05 \times 10^{-07}$  |



|           |                                                                                   |              |               |                         |
|-----------|-----------------------------------------------------------------------------------|--------------|---------------|-------------------------|
| <b>16</b> | $\text{Ar}-\text{NH}_2$<br>$\text{Ar}-\underset{\text{H}}{\text{N}}-\text{R}$     | 70 (67.31 %) | 31 (36.47 %)  | $3.22 \times 10^{-07}$  |
| <b>17</b> | 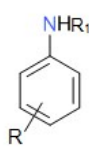 | 70 (67.31 %) | 31 (36.47 %)  | $3.22 \times 10^{-07}$  |
| <b>18</b> |  | 6 (5.77 %)   | 31 (36.47 %)  | $-3.40 \times 10^{-07}$ |
| <b>19</b> | $\text{R}-\text{X}$                                                               | 9 (8.65 %)   | 35 (41.18 %)  | $-5.15 \times 10^{-07}$ |
| <b>20</b> | <b>Halogens</b><br><b>F Cl Br</b><br><b>I At</b>                                  | 9<br>(8.7%)  | 35<br>(41.2%) | $-5.15 \times 10^{-07}$ |

**Supplementary Table 3.** Occurrence (appearance count as well as *p*-values of respective distribution) of functional groups in substrate or non-substrate in case of hOCT2. Positive and negative *p*-values signify the presence of specific group (s) in substrate and non-substrate sets respectively.

| No | Structure                                                                                     | Substrate | Non-substrate | <i>p</i> -Value         |
|----|-----------------------------------------------------------------------------------------------|-----------|---------------|-------------------------|
| 1  | <p>LS</p>    | 2 (4 %)   | 20 (27.03 %)  | $-8.57 \times 10^{-04}$ |
| 2  |              | 3 (6 %)   | 22 (29.73 %)  | -0.00121                |
| 3  |              | 4 (8 %)   | 24 (32.43 %)  | -0.00151                |
| 4  |            | 1 (2 %)   | 15 (20.27 %)  | -0.00246                |
| 5  |            | 0 (0 %)   | 10 (13.51 %)  | -0.0055                 |
| 6  | <p>HS</p>  | 0 (0 %)   | 10 (13.51 %)  | -0.0055                 |
| 7  | <p>HS</p>  | 0 (0 %)   | 10 (13.51 %)  | -0.0055                 |

|    |                                                                                           |           |              |          |
|----|-------------------------------------------------------------------------------------------|-----------|--------------|----------|
| 8  | 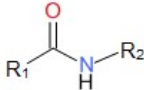         | 4 (8 %)   | 21 (28.38 %) | -0.00604 |
| 9  |          | 16 (32 %) | 10 (13.51 %) | 0.00773  |
| 10 |          | 0 (0 %)   | 9 (12.16 %)  | -0.00952 |
| 11 |          | 17 (34 %) | 12 (16.22 %) | 0.0119   |
| 12 | LS<br> | 4 (8 %)   | 19 (25.67 %) | -0.0142  |
| 13 |        | 4 (8 %)   | 19 (25.67 %) | -0.0142  |
| 14 |        | 15 (30 %) | 10 (13.51 %) | 0.0147   |
| 15 |        | 15 (30 %) | 10 (13.51 %) | 0.0147   |
| 16 | HS<br> | 2 (4 %)   | 14 (18.92 %) | -0.0157  |

|    |                                                                                    |           |              |         |
|----|------------------------------------------------------------------------------------|-----------|--------------|---------|
| 17 | 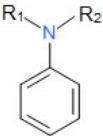  | 2 (4 %)   | 14 (18.92 %) | -0.0157 |
| 18 |   | 2 (4 %)   | 14 (18.92 %) | -0.0157 |
| 19 |   | 14 (28 %) | 9 (12.16 %)  | 0.0161  |
| 20 |  | 14 (28 %) | 9 (12.16 %)  | 0.0161  |

**Supplementary Table 4.** Distribution of compounds in the training, invisible training, calibration and validation set in three random splits

| <b>Split number</b> | <b>Training(+)</b>                                                                                                                                                                                                                                                                                    | <b>Invisible training(-)</b>                                                                                                                                                                                                                                                                         | <b>Calibration (#)</b>                                                                                                       | <b>Validation (*)</b>                                                                                                     |
|---------------------|-------------------------------------------------------------------------------------------------------------------------------------------------------------------------------------------------------------------------------------------------------------------------------------------------------|------------------------------------------------------------------------------------------------------------------------------------------------------------------------------------------------------------------------------------------------------------------------------------------------------|------------------------------------------------------------------------------------------------------------------------------|---------------------------------------------------------------------------------------------------------------------------|
| Split 1             | 1, 2, 4, 14, 15, 16, 23, 24, 28, 29, 30, 34, 35, 36, 37, 39, 43, 49, 54, 61, 64, 66, 67, 70, 71, 76, 86, 87, 90, 93, 94, 95, 105, 113, 114, 115, 119, 120, 121, 125, 126, 127, 128, 132, 134, 135, 137, 138, 139, 140, 144, 145, 151, 152, 157, 163, 164, 166, 170, 174, 175, 183, 185, 186, 189, 195 | 190, 188, 187, 180, 179, 176, 173, 172, 171, 165, 161, 158, 155, 154, 153, 149, 148, 146, 142, 141, 131, 130, 129, 124, 122, 118, 116, 112, 111, 110, 108, 104, 101, 100, 96, 92, 91, 88, 85, 84, 77, 75, 73, 72, 69, 68, 58, 57, 56, 51, 45, 41, 40, 38, 33, 31, 26, 25, 22, 21, 18, 12, 9, 6, 5, 3 | 106, 107, 109, 117, 133, 136, 143, 147, 150, 156, 160, 162, 167, 194, 89, 9832, 42, 48, 50, 53, 55, 59, 60, 65, 13, 17, 7, 8 | 10, 102, 103, 11, 123, 168, 169, 177, 181, 184, 19, 191, 193, 196, 20, 27, 44, 46, 47, 52, 62, 63, 74, 78, 79, 80, 81, 99 |
| Split 2             | 3,7,9,10,11,16,18,19,20,27,28,29,32,34,37,38,42,47,48,49,50,55,60,64,65,69,72,75,81,86,88,91,93,99,102,103,111,114,115,117,123,128,132,133,136,138,140,142,143,145,146,147,150,155,156,160,164,172,175,176,183,185,188,189,193,196                                                                    | 194,190,186,179,174,173,169,167,163,162,158,157,149,148,144,134,131,129,127,126,125,124,122,118,116,113,112,110,109,107,105,104,100,98,96,95,94,89,87,85,80,79,74,71,68,67,66,59,58,57,54,53,51,44,41,39,33,31,30,21,17,15,14,12,8,4,2,1                                                             | 119,121,135,137,151,152,154,16,5,168,171,181,187,191,22,25,26,36,43,45,46,52,56,63,70,77,84,92                               | 101,106,108,120,13,130,139,141,153,161,166,170,177,180,184,195,23,24,35,40,5,6,61,62,73,76,78,90                          |

|         |                                                                                                                                                                                                                                                                                                                                              |                                                                                                                                                                                                                                                                                                                                          |                                                                                                                             |                                                                                                                              |
|---------|----------------------------------------------------------------------------------------------------------------------------------------------------------------------------------------------------------------------------------------------------------------------------------------------------------------------------------------------|------------------------------------------------------------------------------------------------------------------------------------------------------------------------------------------------------------------------------------------------------------------------------------------------------------------------------------------|-----------------------------------------------------------------------------------------------------------------------------|------------------------------------------------------------------------------------------------------------------------------|
| Split 3 | 1, 2, 8, 10, 12, 15,<br>18, 19, 20, 22, 23,<br>25, 29, 31, 35, 38,<br>39, 44, 45, 46, 62,<br>63, 67, 68, 74, 5,<br>78, 79, 80, 84, 86,<br>87, 92, 98, 100,<br>103, 104, 107, 110,<br>116, 117, 121, 122,<br>123, 124, 129, 132,<br>133, 135, 142, 143,<br>144, 149, 155, 157,<br>164, 165, 167, 168,<br>170, 179, 188, 193,<br>194, 195, 196 | 190, 189, 184, 180,<br>173, 171, 169, 166,<br>163, 162, 158, 156,<br>147, 146, 138, 130,<br>128, 127, 125, 115,<br>114, 113, 111, 109,<br>108, 106, 105, 101,<br>99, 96, 94, 93, 91,<br>77, 76, 73, 72, 71,<br>69, 60, 59, 58, 57,<br>52, 51, 50, 48, 47,<br>42, 40, 37, 36, 34,<br>33, 32, 27, 26, 24,<br>21, 17, 16, 14, 9, 7,<br>6, 5 | 11, 118, 119,<br>120,136,137,140<br>,145,150,152,17<br>4,175,177,181,1<br>83,185,28, 3,30,<br>4,43,49,54,55,64<br>,66,70,85 | 102,112,126,13,131,<br>134,139,141,148,151<br>,153,154,160,161,17<br>2,176,186,187,191,4<br>1,53,56,61,65,81,88,<br>89,90,95 |
|---------|----------------------------------------------------------------------------------------------------------------------------------------------------------------------------------------------------------------------------------------------------------------------------------------------------------------------------------------------|------------------------------------------------------------------------------------------------------------------------------------------------------------------------------------------------------------------------------------------------------------------------------------------------------------------------------------------|-----------------------------------------------------------------------------------------------------------------------------|------------------------------------------------------------------------------------------------------------------------------|

**Supplementary Table 5.** Structural attributes in three runs of Monte Carlo optimization [SMILES and GAO with  ${}^0\text{EC}_k$  of split-1]

| SAk                          | CWs Probe 1 | CWs Probe 2 | CWs Probe 3 |
|------------------------------|-------------|-------------|-------------|
| <b>Promoters of activity</b> |             |             |             |
| N...C.....                   | 3.81248     | 3.93661     | 5.24514     |
| EC0-2p2 8...                 | 0.62723     | 0.00051     | 0.06693     |
| c...(.....                   | 1.18659     | 1.56277     | 0.1896      |
| N...(.....                   | 1.69078     | 1.49757     | 1.25226     |
| HALO0000000                  | 0.31309     | 1.30763     | 2.56277     |
| NOSP11000000                 | 3.1285      | 2.31249     | 1.3776      |
| c...c...c...                 | 3.75246     | 3.12789     | 3.24543     |
| ++++N---B2==                 | 10.50486    | 5.37317     | 7.74702     |
| c...1.....                   | 1.75059     | 1.75419     | 0.99673     |
| ++++O---B2==                 | 3.75059     | 3.18596     | 2.87911     |
| EC0-2s2 3...                 | 0.6854      | 1.87924     | 0.5002      |
| c...c...(...                 | 2.68389     | 1.62057     | 0.74732     |
| EC0-2p4 3...                 | 0.19163     | 2.12331     | 1.99591     |
| c...1...c...                 | 0.55758     | 1.43725     | 2.12313     |
| EC0-1s2 10..                 | 1.87997     | 1.93368     | 0.31105     |
| EC0-2p2 10..                 | 1.37752     | 2.62213     | 2.06506     |
| O...=...(...                 | 0.80773     | 0.7523      | 0.25207     |
| c...c...1...                 | 4.12076     | 2.62031     | 2.75492     |
| EC0-2p2 6...                 | 2.37361     | 0.24608     | 2.68676     |
| N...(...C...                 | 2.62506     | 3.55954     | 1.94241     |
| c...2...c...                 | 1.442       | 1.43364     | 1.05998     |
| 1...(.....                   | 3.68641     | 3.1282      | 2.05759     |
| EC0-1s2 5...                 | 1.4417      | 1.31481     | 1.25063     |
| EC0-2s2 5...                 | 2.12185     | 1.50431     | 2.31082     |
| EC0-2p3 5...                 | 4.06169     | 3.75445     | 4.12412     |
| EC0-1s2 4...                 | 2.81261     | 4.25016     | 3.06364     |
| EC0-2s2 4...                 | 3.62576     | 3.00326     | 3.87013     |
| (...N...(...                 | 1.25183     | 3.62097     | 2.44168     |
| C...(...C...                 | 5.8764      | 6.12125     | 6.5582      |
| EC0-2p4 4...                 | 4.37597     | 3.4404      | 3.68762     |
| N...C...C...                 | 4.12334     | 2.50125     | 2.49617     |
| ++++S---B2==                 | 1.37447     | 0.37687     | 0.62885     |
| BOND10000000                 | 0.62584     | 1.87043     | 1.62456     |
| EC0-3p4 6...                 | 0.12553     | 1.25351     | 0.6243      |
| c...1...(...                 | 1.74545     | 1.56391     | 3.55994     |
| 1...c...(...                 | 4.62789     | 5.94182     | 5.93309     |
| O...C...(...                 | 3.68628     | 3.12637     | 4.81693     |
| s...(.....                   | 2.31221     | 0.81375     | 0.00164     |
| s.....                       | 0.74788     | 0.62913     | 0.37155     |
| \$10011000000                | 11.05943    | 4.25041     | 8.69155     |
| C...O...(...                 | 1.12726     | 1.18989     | 2.06266     |

|               |          |          |         |
|---------------|----------|----------|---------|
| s...2...(...  | 1.12438  | 0.56519  | 0.249   |
| C...N...C...  | 6.87852  | 4.87663  | 7.05955 |
| [...(C...     | 6.74593  | 4.80839  | 6.50477 |
| [...H...@...  | 1.56341  | 0.06074  | 0.05796 |
| \$10111000000 | 8.4382   | 4.94224  | 4.81618 |
| c...O.....    | 2.68396  | 1.37035  | 1.81311 |
| C...[...C...  | 2.69013  | 5.370252 | 4.75417 |
| c...3.....    | 0.4396   | 0.37938  | 0.87786 |
| n.....        | 1.43866  | 0.31133  | 0.62734 |
| H...@@.....   | 1.18717  | 0.12708  | 1.62956 |
| O...C...C...  | 2.49553  | 1.621    | 2.68902 |
| c...c...3...  | 3.00139  | 1.37906  | 0.44008 |
| C...(1...     | 4.37237  | 1.12178  | 3.00266 |
| C...O...C...  | 4.49502  | 2.3118   | 6.12035 |
| n...c.....    | 0.12864  | 0.24519  | 0.50092 |
| C...3.....    | 1.62252  | 0.8113   | 2.37818 |
| O...(1...     | 6.30872  | 4.31234  | 5.19039 |
| c...(1...     | 3.12856  | 3.50124  | 2.24773 |
| 4.....        | 1.12213  | 0.62195  | 1.93824 |
| C...1.....    | 1.12213  | 2.19108  | 1.62582 |
| BOND00000000  | 9.0619   | 4.74858  | 3.25009 |
| O...(2...     | 4.81088  | 3.80958  | 4.31033 |
| C...2...(...  | 0.68621  | 0.94176  | 1.31374 |
| C...C...3...  | 1.00357  | 2.87355  | 0.99647 |
| [...3.....    | 0.81113  | 1.50299  | 4.37549 |
| c...(O...     | 3.81126  | 3.31468  | 5.06002 |
| N...(N...     | 4.68538  | 5.68347  | 5.74728 |
| n...c...(...  | 4.68307  | 2.81193  | 3.05828 |
| 4...(.....    | 1.24949  | 1.81407  | 0.87383 |
| C...c...1...  | 5.31608  | 3.87328  | 5.00115 |
| H...[...3...  | 2.43861  | 1.62734  | 1.37231 |
| N...C...3...  | 5.81023  | 4.99921  | 3.06632 |
| [...N.....    | 3.37951  | 3.18569  | 3.9378  |
| [...O.....    | 1.44135  | 5.12048  | 2.12456 |
| c...(C...     | 12.56326 | 11.87646 | 10.9416 |
| ++++F---N===  | 1.62166  | 1.18599  | 1.94231 |
| +.....        | 3.12567  | 5.68959  | 0.56162 |
| 3...c...(...  | 5.49793  | 6.56298  | 7.43351 |
| N...1.....    | 2.25491  | 0.87787  | 2.12336 |
| N...2.....    | 2.12956  | 1.93723  | 0.93364 |
| O...1.....    | 3.37351  | 2.18962  | 4.87936 |
| O...[...C...  | 6.81246  | 4.3107   | 6.80833 |
| [...+.....    | 5.12216  | 4.81068  | 3.69157 |
| [...3...C...  | 1.12594  | 0.55897  | 1.99689 |
| [...O...(...  | 4.06593  | 3.99938  | 3.87204 |
| c...4...c...  | 3.49834  | 1.18282  | 1.50168 |



|               |         |         |         |
|---------------|---------|---------|---------|
| \$00011000000 | 3.24612 | 3.56336 | 5.37704 |
| ++++F---O===  | 2.43574 | 0.74629 | 2.7496  |
| +...[...(...  | 2.24671 | 5.0673  | 2.93447 |
| 1...O...(...  | 3.68862 | 3.55951 | 2.87877 |
| 3...c...2...  | 3.37604 | 0.93667 | 0.1235  |
| 3...s...(...  | 0.37995 | 0.87383 | 0.18806 |
| C...1...(...  | 3.12664 | 4.00307 | 4.75405 |
| C...C...1...  | 3.05977 | 2.1246  | 1.0585  |
| N...+.....    | 4.37961 | 3.05804 | 4.06677 |
| [...+...N...  | 3.37701 | 3.87756 | 3.62301 |
| [...2.....    | 1.50013 | 0.25144 | 0.68439 |
| [...N...+...  | 4.06186 | 4.43748 | 3.37022 |
| c...(N...     | 6.99754 | 7.31431 | 6.62537 |
| c...C...(...  | 3.5045  | 2.44009 | 4.75215 |
| c...n...(...  | 6.37923 | 5.12276 | 6.12585 |
| n...1.....    | 1.74918 | 1.3716  | 3.25281 |
| n...[.....    | 3.87576 | 4.87848 | 4.12661 |
| ++++F---B2==  | 6.4377  | 6.24681 | 3.37572 |
| ++++CL--N===  | 9.75345 | 4.44223 | 3.24522 |
| 2...C...(...  | 2.24975 | 1.24712 | 4.56317 |
| C...(4...     | 3.37139 | 5.24731 | 8.24845 |
| C...3...C...  | 4.94016 | 6.1856  | 6.43262 |
| C...4.....    | 6.24686 | 6.99659 | 6.56308 |
| C...C...4...  | 1.68755 | 0.06566 | 4.24749 |
| C...N...1...  | 6.06479 | 3.55859 | 4.62414 |
| EC0-2p3 12..  | 4.93777 | 5.12637 | 4.81212 |
| EC0-3s2 12..  | 4.252   | 0.37449 | 1.93641 |
| H...[...2...  | 5.06488 | 4.37618 | 3.56112 |
| S...(.....    | 1.49979 | 1.30785 | 0.18992 |
| S...(=...     | 0.99978 | 1.68733 | 1.99847 |
| [...n...H...  | 2.5016  | 3.68993 | 1.06567 |
| c...n...1...  | 1.1219  | 1.24701 | 2.93275 |
| n...H.....    | 1.31693 | 2.81725 | 3.62693 |
| n...H...[...  | 3.68399 | 1.68381 | 0.00137 |
| =...N...(...  | 2.99542 | 4.37588 | 3.68457 |
| C...(3...     | 1.24699 | 4.06476 | 4.80964 |
| EC0-2p3 4...  | 3.37139 | 3.37428 | 3.56391 |
| N...1...C...  | 1.24562 | 1.68426 | 2.6201  |
| N...4.....    | 2.24747 | 2.62577 | 2.75145 |
| N...4...C...  | 0.12819 | 1.12671 | 1.43254 |
| N...=...(...  | 3.75224 | 3.99583 | 1.6253  |
| N...=.....    | 3.55837 | 3.56129 | 3.25065 |
| O...1...(...  | 1.62278 | 1.74684 | 2.68971 |
| O...c...2...  | 7.81286 | 7.75401 | 7.93586 |
| [...1...(...  | 5.62281 | 5.93928 | 7.00192 |
| [...2...(...  | 0.69172 | 1.44203 | 1.1917  |

|                                |          |          |          |
|--------------------------------|----------|----------|----------|
| [...C...N...                   | 15.44133 | 8.37107  | 14.37535 |
| c...(.[...                     | 9.1281   | 7.50198  | 10.87894 |
| c...1...O...                   | 8.00151  | 6.68759  | 7.37086  |
| c...2...C...                   | 1.8733   | 3.74871  | 4.74906  |
| c...[.....                     | 0.31631  | 1.56259  | 1.56344  |
| n...1...c...                   | 9.31714  | 6.5634   | 10.00018 |
| n...c...2...                   | 9.31113  | 11.31052 | 7.18733  |
| \$00010000000                  | 13.00494 | 11.06253 | 7.56032  |
| \$10011100000                  | 4.1226   | 5.1202   | 7.49634  |
| \$10111001000                  | 7.00007  | 10.87586 | 8.68511  |
| 1...(.(...                     | 14.69191 | 13.00401 | 14.7515  |
| 1...n...(...                   | 4.75327  | 2.24514  | 4.00427  |
| 3...S...2...                   | 4.81477  | 3.06418  | 3.25008  |
| 4...c...(...                   | 10.37186 | 4.12983  | 11.37294 |
| C...2...C...                   | 8.18539  | 6.62275  | 6.30981  |
| C...4...(...                   | 2.74784  | 3.87487  | 3.44143  |
| C...N...4...                   | 1.74664  | 0.56344  | 4.19121  |
| N...c...1...                   | 3.50009  | 1.99537  | 3.25268  |
| O...(3...                      | 5.49571  | 6.56076  | 5.8143   |
| O...C...3...                   | 3.93985  | 6.18648  | 5.19158  |
| S...2...(...                   | 0.56292  | 1.05806  | 4.2533   |
| S...3.....                     | 4.87644  | 1.37765  | 3.56695  |
| S...C.....                     | 7.5619   | 3.87285  | 9.68436  |
| [...(N...                      | 4.99547  | 2.18844  | 4.93437  |
| [...1...C...                   | 6.81162  | 4.93607  | 4.12762  |
| [...C...1...                   | 6.00084  | 7.12307  | 3.37009  |
| c...(=...                      | 5.68376  | 1.62585  | 5.1855   |
| c...1...C...                   | 3.56463  | 1.87979  | 1.56364  |
| c...3...(...                   | 1.12151  | 1.75484  | 4.12658  |
| c...3...S...                   | 8.05779  | 6.06431  | 4.99788  |
| c...O...(...                   | 9.3724   | 10.12541 | 10.24631 |
| n...[...3...                   | 1.87689  | 0.19239  | 1.00006  |
| n...[...c...                   | 10.49756 | 6.99812  | 8.99776  |
| <b>Promoters of inactivity</b> |          |          |          |
| EC0-1s1 3...                   | -0.50333 | -0.6257  | -0.50439 |
| EC0-1s2 6...                   | -1.56228 | -0.49711 | -1.12477 |
| EC0-2s2 6...                   | -1.2485  | -0.25085 | -1.24822 |
| C...(.....                     | -0.69155 | -1.05856 | -1.49751 |
| C.....                         | -0.62104 | -0.74888 | -1.24887 |
| EC0-1s2 7...                   | -1.56137 | -1.06428 | -3.24543 |
| EC0-2s2 7...                   | -1.93763 | -1.06509 | -1.12737 |
| EC0-2s2 9...                   | -1.253   | -0.6256  | -0.74502 |
| 0                              | -1.62181 | -2.25161 | -1.06379 |
| EC0-2s2 8...                   | -0.50478 | -0.00266 | -0.12322 |
| O...(.....                     | -0.62116 | -0.18555 | -0.12702 |

|              |          |          |          |
|--------------|----------|----------|----------|
| 2.....       | -3.05843 | -3.31602 | -2.43841 |
| C...C.....   | -1.49835 | -0.62396 | -0.87007 |
| EC0-2p3 7... | -1.68669 | -1.05882 | -1.62984 |
| C...N...(... | -2.75406 | -1.37538 | -2.50488 |
| EC0-2p4 6... | -0.43561 | -1.62263 | -1.62926 |
| c...2.....   | -0.87277 | -1.12511 | -1.06635 |
| 2...(.....   | -3.31431 | -4.00043 | -2.00295 |
| c...c...2... | -0.5002  | -1.62532 | -0.75487 |
| [...C.....   | -0.502   | -0.49565 | -0.99986 |
| H.....       | -1.12492 | -0.37937 | -1.31478 |
| [...H.....   | -1.49701 | -0.05846 | -0.44025 |
| [...(.....   | -0.37896 | -0.75321 | -1.12789 |
| @.....       | -0.74799 | -0.87422 | -1.87478 |
| C...@.....   | -2.18953 | -0.50044 | -2.37599 |
| [...C...@... | -1.30832 | -1.24889 | -1.06698 |
| EC0-1s2 12.. | -2.99948 | -2.74668 | -2.25172 |
| EC0-2s2 12.. | -2.99507 | -2.7506  | -2.00028 |
| @@.....      | -0.93473 | -0.24927 | -1.81194 |
| C...@@.....  | -0.12888 | -0.62447 | -1.62103 |
| 2...c...1... | -2.68777 | -1.7463  | -2.06045 |
| c...O...C... | -1.0046  | -1.75468 | -1.871   |
| 3...(.....   | -1.87461 | -1.87567 | -2.56447 |
| O...c...1... | -2.37575 | -1.37273 | -1.62805 |
| EC0-2p2 12.. | -1.6855  | -2.74796 | -0.62025 |
| C...2.....   | -1.87611 | -1.3719  | -1.37065 |
| C...C...2... | -2.69095 | -2.43811 | -2.87679 |
| C...(...(... | -2.56312 | -1.80924 | -2.87101 |
| [...C...C... | -1.31413 | -0.93811 | -0.74834 |
| n...(.....   | -2.37938 | -1.37031 | -2.44172 |
| n...2.....   | -2.69009 | -2.05832 | -1.94009 |
| [...1.....   | -1.25035 | -1.25184 | -0.18843 |
| c...2...(... | -2.68822 | -1.43318 | -1.81659 |
| 1...C...(... | -8.87823 | -5.25034 | -6.25289 |
| C...(...2... | -2.87219 | -1.56216 | -2.5044  |
| C...[...(... | -0.75074 | -1.37172 | -2.06265 |
| F...(...     | -2.62655 | -0.87973 | -2.37894 |
| F.....       | -0.75437 | -1.93737 | -1.68478 |
| EC0-2p5 3... | -1.93406 | -2.75149 | -2.75136 |
| [...(...O... | -4.37865 | -5.30769 | -3.25123 |
| 2...N...(... | -1.62303 | -1.00085 | -1.81012 |
| C...3...(... | -6.62908 | -5.00469 | -6.18302 |
| H...[...1... | -1.56586 | -0.55942 | -0.30866 |
| N...2...C... | -1.9369  | -1.62431 | -2.69015 |
| n...2...c... | -1.80762 | -0.44085 | -2.0593  |
| ++++F---S=== | -1.31249 | -2.87524 | -1.93633 |
| 2...n...(... | -3.50466 | -3.62345 | -1.18952 |

|               |           |          |          |
|---------------|-----------|----------|----------|
| C...=.....    | -11.93888 | -9.87308 | -7.75134 |
| Cl.....       | -1.99829  | -1.68899 | -0.06095 |
| N...(1...     | -8.49523  | -5.18261 | -7.56526 |
| c...N.....    | -1.50489  | -1.7529  | -1.93564 |
| n...(1...     | -3.05753  | -3.55966 | -2.31232 |
| n...2...(     | -3.81703  | -2.81714 | -3.55874 |
| n...c...c...  | -0.56637  | -0.75383 | -2.37915 |
| (...Cl.(...   | -1.81643  | -3.43964 | -3.31662 |
| ++++Cl--B2==  | -2.99758  | -2.68859 | -2.37195 |
| C...c...3...  | -4.4371   | -0.68906 | -2.74741 |
| F...(C...     | -2.37872  | -1.62699 | -3.56676 |
| Cl.(.....     | -2.9952   | -2.9363  | -1.81117 |
| N...3.....    | -3.06695  | -2.68908 | -2.68947 |
| [...1...[...  | -2.62841  | -3.37703 | -3.37568 |
| c...n...c...  | -2.94013  | -2.18691 | -2.43299 |
| n...1...(     | -8.50107  | -6.56739 | -3.80886 |
| \$00111000000 | -9.55904  | -8.31335 | -7.50258 |
| \$10011000100 | -6.81736  | -7.0665  | -3.75431 |
| (...F...(     | -1.80929  | -2.49531 | -2.18883 |
| (...S...(     | -2.43978  | -4.30893 | -5.0635  |
| 1...N...(     | -3.56273  | -3.62584 | -3.62374 |
| 3...N...(     | -0.4993   | -0.37112 | -0.49804 |
| @@[...1...    | -2.62418  | -3.68406 | -3.24979 |
| C...=...(     | -5.87816  | -7.00427 | -6.24672 |
| C...c...4...  | -9.43679  | -5.75113 | -7.438   |
| BOND00100000  | -8.31416  | -8.87522 | -4.56219 |
| F...(C...     | -2.1851   | -3.25036 | -3.75255 |
| F...(F...     | -6.18604  | -4.43592 | -2.06053 |
| EC0-2p3 11..  | -2.62076  | -0.18368 | -1.4991  |
| Cl...(2...    | -1.81404  | -0.879   | -2.31012 |
| N...(Cl..     | -8.37225  | -7.24913 | -5.68985 |
| S...2.....    | -1.12348  | -2.25208 | -3.12332 |
| [...(2...     | -3.1916   | -1.18454 | -2.93629 |
| [...@@.....   | -2.87802  | -0.74988 | -0.87087 |
| [...@@..C...  | -0.31551  | -0.56004 | -2.0614  |
| c...(2...     | -2.2482   | -2.00003 | -2.87898 |
| c...3...N...  | -4.74803  | -2.69085 | -5.50185 |
| c...c...[...  | -6.74628  | -7.62265 | -7.74617 |
| n...c...3...  | -2.37037  | -2.93436 | -2.74796 |

**Supplementary Table 6.** Statistics of the training and test set for the Bayesian classification models of hOCT2

| Dataset | ROC score | ROC rating | True Positive | False Negative | False Positive | True Negative | Sensitivity | Specificity | Accuracy |
|---------|-----------|------------|---------------|----------------|----------------|---------------|-------------|-------------|----------|
| Train   | 0.764     | Fair       | 37            | 1              | 16             | 45            | 0.974       | 0.738       | 0.828    |
| Test    | 0.571     | Fail       | 11            | 1              | 8              | 5             | 0.917       | 0.385       | 0.640    |

**Supplementary Table 7.** Performance of various models by fivefold cross-validation for hOCT1 (BA=Balance accuracy; MCC=Matthew's correlation coefficient; SE=Sensitivity; SP=Specificity)

|                        | ASNN TRAIN          | ASNN TEST           | KNN TRAIN    | KNN TEST     | WEKA RF TRAIN       | WEKA RF TEST        | XG BOOST TRAIN | XG BOOST TEST |
|------------------------|---------------------|---------------------|--------------|--------------|---------------------|---------------------|----------------|---------------|
| <b>E-state, ALogPS</b> |                     |                     |              |              |                     |                     |                |               |
| Accuracy               | 80% ± 3.0           | 76% ± 8.0           | 76% ± 3.0    | 68% ± 8.0    | <b>85% ± 3.0</b>    | <b>79% ± 7.0</b>    | 81% ± 3.0      | 74% ± 8.0     |
| BA                     | 80% ± 3.0           | 75% ± 7.0           | 74% ± 3.0    | 63% ± 7.0    | <b>85% ± 3.0</b>    | <b>78% ± 7.0</b>    | 81% ± 3.0      | 72% ± 7.0     |
| MCC                    | 0.61 ± 0.07         | 0.5 ± 0.1           | 0.52 ± 0.07  | 0.3 ± 0.2    | <b>0.7 ± 0.06</b>   | <b>0.6 ± 0.1</b>    | 0.63 ± 0.07    | 0.4 ± 0.1     |
| AUC                    | 0.879 ± 0.01        | 0.861 ± 0.01        | 0.808 ± 0.01 | 0.788 ± 0.01 | <b>0.834 ± 0.01</b> | <b>0.735 ± 0.01</b> | 0.897 ± 0.01   | 0.904 ± 0.01  |
| SE                     | 0.814               | 0.826               | 0.901        | 0.869        | <b>0.839</b>        | <b>0.826</b>        | 0.851          | 0.782         |
| SP                     | 0.791               | 0.666               | 0.582        | 0.4          | <b>0.857</b>        | <b>0.733</b>        | 0.771          | 0.666         |
| <b>GSFragment</b>      |                     |                     |              |              |                     |                     |                |               |
| Accuracy               | 78% ± 3.0           | 79% ± 7.0           | 73% ± 4.0    | 74% ± 8.0    | 79% ± 3.0           | 71% ± 8.0           | 75% ± 3.0      | 71% ± 8.0     |
| BA                     | 78% ± 3.0           | 78% ± 7.0           | 72% ± 3.0    | 70% ± 8.0    | 79% ± 3.0           | 70% ± 8.0           | 75% ± 4.0      | 70% ± 7.0     |
| MCC                    | 0.56 ± 0.07         | 0.6 ± 0.1           | 0.47 ± 0.07  | 0.4 ± 0.2    | 0.57 ± 0.07         | 0.4 ± 0.2           | 0.51 ± 0.07    | 0.4 ± 0.1     |
| AUC                    | 0.804 ± 0.01        | 0.974 ± 0.01        | 0.775 ± 0.01 | 0.881 ± 0.01 | 0.742 ± 0.01        | 0.67 ± 0.01         | 0.823 ± 0.01   | 0.843 ± 0.01  |
| SE                     | 0.8024              | 0.826               | 0.888        | 0.869        | 0.802               | 0.739               | 0.777          | 0.739         |
| SP                     | 0.7571              | 0.7333              | 0.542        | 0.533        | 0.771               | 0.666               | 0.772          | 0.666         |
| <b>Dragon v. 7</b>     |                     |                     |              |              |                     |                     |                |               |
| Accuracy               | <b>85% ± 3.0</b>    | <b>79% ± 7.0</b>    | 75% ± 3.0    | 76% ± 8.0    | 87% ± 3.0           | 74% ± 8.0           | 83% ± 3.0      | 76% ± 8.0     |
| BA                     | <b>85% ± 3.0</b>    | <b>79% ± 7.0</b>    | 74% ± 3.0    | 73% ± 8.0    | 87% ± 3.0           | 72% ± 8.0           | 83% ± 3.0      | 76% ± 8.0     |
| MCC                    | <b>0.71 ± 0.06</b>  | <b>0.6 ± 0.1</b>    | 0.52 ± 0.07  | 0.5 ± 0.2    | 0.75 ± 0.05         | 0.4 ± 0.1           | 0.67 ± 0.06    | 0.5 ± 0.2     |
| AUC                    | <b>0.875 ± 0.01</b> | <b>0.783 ± 0.01</b> | 0.821 ± 0.01 | 0.861 ± 0.01 | 0.84 ± 0.01         | 0.713 ± 0.01        | 0.837 ± 0.01   | 0.78 ± 0.01   |
| SE                     | <b>0.888</b>        | <b>0.7826</b>       | 0.888        | 0.869        | 0.876               | 0.782               | 0.826          | 0.782         |
| SP                     | <b>0.8142</b>       | <b>0.8</b>          | 0.6          | 0.6          | 0.871               | 0.666               | 0.785          | 0.733         |
| <b>ISIDA fragments</b> |                     |                     |              |              |                     |                     |                |               |

|                  |              |              |              |              |              |              |              |              |
|------------------|--------------|--------------|--------------|--------------|--------------|--------------|--------------|--------------|
| <b>Accuracy</b>  | 77% ± 3.0    | 82% ± 7.0    | 74% ± 4.0    | 71% ± 8.0    | 77% ± 3.0    | 79% ± 5.0    | 74% ± 3.0    | 82% ± 5.0    |
| <b>BA</b>        | 77% ± 3.0    | 81% ± 7.0    | 73% ± 4.0    | 68% ± 8.0    | 77% ± 3.0    | 78% ± 7.0    | 74% ± 3.0    | 81% ± 7.0    |
| <b>MCC</b>       | 0.54 ± 0.07  | 0.6 ± 0.1    | 0.47 ± 0.07  | 0.4 ± 0.2    | 0.54 ± 0.07  | 0.6 ± 0.1    | 0.47 ± 0.07  | 0.6 ± 0.1    |
| <b>AUC</b>       | 0.858 ± 0.01 | 0.922 ± 0.01 | 0.776 ± 0.01 | 0.799 ± 0.01 | 0.765 ± 0.01 | 0.735 ± 0.01 | 0.828 ± 0.01 | 0.948 ± 0.01 |
| <b>SE</b>        | 0.7283       | 0.826        | 0.79         | 0.826        | 0.753        | 0.826        | 0.703        | 0.826        |
| <b>SP</b>        | 0.814        | 0.8          | 0.671        | 0.533        | 0.785        | 0.733        | 0.771        | 0.8          |
| <b>CDK 2.0</b>   |              |              |              |              |              |              |              |              |
| <b>Accuracy</b>  | 82% ± 3.0    | 73% ± 8.0    | 79% ± 3.0    | 73% ± 8.0    | 87% ± 3.0    | 76% ± 8.0    | 83% ± 3.0    | 70% ± 8.0    |
| <b>BA</b>        | 82% ± 3.0    | 70% ± 8.0    | 78% ± 3.0    | 68% ± 8.0    | 87% ± 3.0    | 73% ± 8.0    | 83% ± 3.0    | 69% ± 8.0    |
| <b>MCC</b>       | 0.64 ± 0.06  | 0.4 ± 0.2    | 0.57 ± 0.07  | 0.4 ± 0.2    | 0.74 ± 0.05  | 0.5 ± 0.2    | 0.66 ± 0.06  | 0.4 ± 0.2    |
| <b>AUC</b>       | 0.904 ± 0.01 | 0.857 ± 0.01 | 0.785 ± 0.01 | 0.832 ± 0.01 | 0.826 ± 0.01 | 0.699 ± 0.01 | 0.821 ± 0.01 | 0.842 ± 0.01 |
| <b>SE</b>        | 0.864        | 0.826        | 0.864        | 0.869        | 0.888        | 0.826        | 0.864        | 0.739        |
| <b>SP</b>        | 0.768        | 0.571        | 0.695        | 0.5          | 0.855        | 0.642        | 0.797        | 0.642        |
| <b>Inductive</b> |              |              |              |              |              |              |              |              |
| <b>Accuracy</b>  | 77% ± 3.0    | 74% ± 8.0    | 72% ± 4.0    | 74% ± 8.0    | 83% ± 3.0    | 74% ± 8.0    | 79% ± 3.0    | 68% ± 7.0    |
| <b>BA</b>        | 76% ± 3.0    | 71% ± 8.0    | 70% ± 4.0    | 69% ± 8.0    | 83% ± 3.0    | 71% ± 7.0    | 80% ± 3.0    | 65% ± 7.0    |
| <b>MCC</b>       | 0.53 ± 0.07  | 0.4 ± 0.     | 0.43 ± 0.07  | 0.4 ± 0.2    | 0.66 ± 0.06  | 0.4 ± 0.1    | 0.59 ± 0.07  | 0.3 ± 0.2    |
| <b>AUC</b>       | 0.815 ± 0.01 | 0.777 ± 0.01 | 0.795 ± 0.01 | 0.67 ± 0.01  | 0.779 ± 0.01 | 0.713 ± 0.01 | 0.844 ± 0.01 | 0.546 ± 0.01 |
| <b>SE</b>        | 0.85         | 0.826        | 0.851        | 0.913        | 802          | 0.826        | 0.79         | 0.826        |
| <b>SP</b>        | 0.671        | 0.6          | 0.557        | 0.466        | 0.857        | 0.6          | 0.8          | 0.466        |
| <b>MERA</b>      |              |              |              |              |              |              |              |              |
| <b>Accuracy</b>  | 73% ± 4.0    | 74% ± 8.0    | 74% ± 4.0    | 71% ± 8.0    | 83% ± 3.0    | 71% ± 8.0    | 80% ± 3.0    | 74% ± 7.0    |
| <b>BA</b>        | 73% ± 4.0    | 71% ± 8.0    | 72% ± 3.0    | 66% ± 7.0    | 82% ± 3.0    | 69% ± 8.0    | 80% ± 3.0    | 74% ± 8.0    |
| <b>MCC</b>       | 0.46 ± 0.08  | 0.4 ± 0.2    | 0.51 ± 0.06  | 0.4 ± 0.2    | 0.65 ± 0.06  | 0.4 ± 0.2    | 0.6 ± 0.07   | 0.5 ± 0.1    |
| <b>AUC</b>       | 0.761 ± 0.01 | 0.759 ± 0.01 | 0.744 ± 0.01 | 0.562 ± 0.01 | 0.768 ± 0.01 | 0.658 ± 0.01 | 0.784 ± 0.01 | 0.701 ± 0.01 |
| <b>SE</b>        | 0.765        | 0.826        | 0.962        | 0.913        | 0.851        | 0.782        | 0.82         | 0.739        |
| <b>SP</b>        | 0.695        | 0.6          | 0.478        | 0.4          | 0.797        | 0.6          | 0.797        | 0.733        |
| <b>MERSY</b>     |              |              |              |              |              |              |              |              |
| <b>Accuracy</b>  | 54% ± 4.0    | 61% ± 8.0    | 52% ± 4.0    | 61% ± 8.0    | 54 ± 0.4     | 63 ± 8.0     | 52 ± 4.0     | 58 ± 8.0     |
| <b>BA</b>        | 52% ± 3.0    | 52% ± 5.0    | 49% ± 3.0    | 52% ± 5.0    | 53 ± 4.0     | 58 ± 7.0     | 51 ± 4.0     | 55 ± 8.0     |
| <b>MCC</b>       | 0.05 ± 0.05  | 0.07 ± 0.05  | -0.01 ± 0.05 | 0.07 ± 0.05  | 0.06 ± 0.05  | 0.2 ± 0.05   | 0.03 ± 0.05  | 0.1 ± 0.05   |

|                      |                 |                 |                 |                 |                               |                               |                               |                               |
|----------------------|-----------------|-----------------|-----------------|-----------------|-------------------------------|-------------------------------|-------------------------------|-------------------------------|
|                      | 0.08            | 0.2             | 0.08            | 0.2             | 0.08                          | 0.2                           | 0.08                          | 0.2                           |
| <b>AUC</b>           | 0.576 ±<br>0.01 | 0.675<br>± 0.01 | 0.489 ±<br>0.01 | 0.558<br>± 0.01 | 0.513 ±<br>0.01               | 0.57 ±<br>0.01                | 0.5 ±<br>0.01                 | 0.641 ±<br>0.01               |
| <b>SE</b>            | 0.827           | 0.913           | 0.802           | 0.913           | 0.604                         | 0.826                         | 0.543                         | 0.695                         |
| <b>SP</b>            | 0.214           | 0.133           | 0.18            | 0.133           | 0.542                         | 0.333                         | 0.485                         | 0.4                           |
| <b>Chemaxon</b>      |                 |                 |                 |                 |                               |                               |                               |                               |
| <b>Accuracy</b>      | 79% ±<br>3.0    | 76% ±<br>7.0    | 78% ±<br>3.0    | 84%<br>± 5.0    | <b>87% ±</b><br><b>3.0</b>    | <b>82% ±</b><br><b>5.0</b>    | <b>89% ±</b><br><b>3.0</b>    | <b>79% ±</b><br><b>7.0</b>    |
| <b>BA</b>            | 79% ±<br>3.0    | 77% ±<br>7.0    | 78% ±<br>3.0    | 81%<br>± 7.0    | <b>87% ±</b><br><b>3.0</b>    | <b>80% ±</b><br><b>7.0</b>    | <b>88% ±</b><br><b>3.0</b>    | <b>78% ±</b><br><b>7.0</b>    |
| <b>MCC</b>           | 0.57 ±<br>0.07  | 0.5 ±<br>0.1    | 0.56 ±<br>0.07  | 0.7 ±<br>0.1    | <b>0.74 ±</b><br><b>0.05</b>  | <b>0.6 ±</b><br><b>0.1</b>    | <b>0.77 ±</b><br><b>0.05</b>  | <b>0.6 ±</b><br><b>0.1</b>    |
| <b>AUC</b>           | 0.852           | 0.878<br>± 0.01 | 0.845 ±<br>0.01 | 0.772<br>± 0.01 | <b>0.843 ±</b><br><b>0.01</b> | <b>0.735 ±</b><br><b>0.01</b> | <b>0.929 ±</b><br><b>0.01</b> | <b>0.814 ±</b><br><b>0.01</b> |
| <b>SE</b>            | 0.79            | 0.739           | 0.851           | 0.956           | <b>0.913</b>                  | <b>0.869</b>                  | <b>0.901</b>                  | <b>0.826</b>                  |
| <b>SP</b>            | 0.781           | 0.8             | 0.701           | 0.666           | <b>0.823</b>                  | <b>0.7333</b>                 | <b>0.867</b>                  | <b>0.826</b>                  |
| <b>QNPR</b>          |                 |                 |                 |                 |                               |                               |                               |                               |
| <b>Accuracy</b>      | 77% ±<br>3.0    | 82% ±<br>5.0    | 81% ±<br>3.0    | 79%<br>± 8.0    | 85% ±<br>3.0                  | 76% ±<br>7.0                  | 79% ±<br>3.0                  | 74% ±<br>8.0                  |
| <b>BA</b>            | 77% ±<br>3.0    | 82% ±<br>6.0    | 80% ±<br>3.0    | 77%<br>± 8.0    | 85% ±<br>3.0                  | 76% ±<br>7.0                  | 79% ±<br>3.0                  | 72% ±<br>8.0                  |
| <b>MCC</b>           | 0.55 ±<br>0.07  | 0.6 ±<br>0.1    | 0.61 ±<br>0.07  | 0.6 ±<br>0.1    | 0.7 ±<br>0.06                 | 0.5 ±<br>0.1                  | 0.59% ±<br>0.07               | 0.4% ±<br>0.1                 |
| <b>AUC</b>           | 0.903 ±<br>0.01 | 0.928<br>± 0.01 | 0.853 ±<br>0.01 | 0.852<br>± 0.01 | 0.829 ±<br>0.01               | 0.735 ±<br>0.01               | 0.86% ±<br>0.01               | 0.823%<br>± 0.01              |
| <b>SE</b>            | 0.814           | 0.782           | 0.864           | 0.869           | 0.839                         | 0.72                          | 0.814                         | 0.782                         |
| <b>SP</b>            | 0.728           | 0.866           | 0.742           | 0.666           | 0.857                         | 0.733                         | 0.771                         | 0.666                         |
| <b>Spectrophores</b> |                 |                 |                 |                 |                               |                               |                               |                               |
| <b>Accuracy</b>      | 76% ±<br>3.0    | 82% ±<br>5.0    | 71% ±<br>4.0    | 71%<br>± 8.0    | 74% ±<br>3.0                  | 82% ±<br>5.0                  | 68% ±<br>4.0                  | 82% ±<br>5.0                  |
| <b>BA</b>            | 76% ±<br>3.0    | 79% ±<br>7.0    | 70% ±<br>4.0    | 69%<br>± 8.0    | 74% ±<br>4.0                  | 80% ±<br>6.0                  | 68% ±<br>4.0                  | 82% ±<br>6.0                  |
| <b>MCC</b>           | 0.53 ±<br>0.07  | 0.6 ±<br>0.1    | 0.41 ±<br>0.07  | 0.4 ±<br>0.2    | 0.49 ±<br>0.07                | 0.6 ±<br>0.1                  | 0.35 ±<br>0.07                | 0.6 ±<br>0.1                  |
| <b>AUC</b>           | 0.763 ±<br>0.01 | 0.933<br>± 0.01 | 0.724 ±<br>0.01 | 0.741<br>± 0.01 | 0.721 ±<br>0.01               | 0.768 ±<br>0.01               | 0.71 ±<br>0.01                | 0.852 ±<br>0.01               |
| <b>SE</b>            | 0.74            | 0.913           | 0.765           | 0.782           | 0.716                         | 0.869                         | 0.654                         | 0.782                         |
| <b>SP</b>            | 0.785           | 0.666           | 0.642           | 0.6             | 0.771                         | 0.733                         | 0.7                           | 0.866                         |

**Supplementary Table 8.** Performance of various models by fivefold cross-validation for hOCT1 (BA=Balance accuracy; MCC=Matthew’s correlation coefficient; SE=Sensitivity; SP=Specificity)

|                        | <b>ASNN<br/>TRAIN</b> | <b>ASNN<br/>TEST</b> | <b>KNN<br/>TRAIN</b> | <b>KNN<br/>TEST</b> | <b>WEKA<br/>RF<br/>TRAIN</b> | <b>WEKA<br/>RF<br/>TEST</b> | <b>XG<br/>BOOST<br/>TRAIN</b> | <b>XG<br/>BOOST<br/>TEST</b> |
|------------------------|-----------------------|----------------------|----------------------|---------------------|------------------------------|-----------------------------|-------------------------------|------------------------------|
| <b>E-state, ALogPS</b> |                       |                      |                      |                     |                              |                             |                               |                              |
| <b>Accuracy</b>        | 69% ±<br>5.0          | 60% ±<br>10.0        | 57% ±<br>5.0         | 61%<br>± 9.0        | 72% ±<br>4.0                 | 61% ±<br>9.0                | 64% ±<br>5.0                  | 60% ±<br>10.0                |
| <b>BA</b>              | 67% ±<br>5.0          | 60% ±<br>10.0        | 55% ±<br>5.0         | 64%<br>± 8.0        | 71% ±<br>4.0                 | 60% ±<br>10.0               | 61% ±<br>5.0                  | 60% ±<br>10.0                |
| <b>MCC</b>             | 0.34 ±<br>0.1         | 0.1 ±<br>0.2         | 0.1 ±<br>0.1         | 0.3 ±<br>0.2        | 0.42 ±<br>0.09               | 0.2 ±<br>0.2                | 0.23 ±<br>0.1                 | 0.2 ±<br>0.2                 |
| <b>AUC</b>             | 0.783 ±<br>0.01       | 0.675<br>± 0.01      | 0.577 ±<br>0.01      | 0.694<br>± 0.01     | 0.691 ±<br>0.01              | 0.583 ±<br>0.01             | 0.731 ±<br>0.01               | 0.684 ±<br>0.01              |
| <b>SE</b>              | 0.575                 | 0.5                  | 0.425                | 0.9                 | 0.6                          | 0.6                         | 0.5                           | 0.5                          |
| <b>SP</b>              | 0.7627                | 0.6                  | 0.672                | 0.384               | 0.81                         | 0.61                        | 0.728                         | 0.66                         |
| <b>GSFragment</b>      |                       |                      |                      |                     |                              |                             |                               |                              |
| <b>Accuracy</b>        | 70% ±<br>4.0          | 64% ±<br>8.0         | 57% ±<br>5.0         | 50%<br>± 10.0       | 71% ±<br>5.0                 | 68% ±<br>8.0                | 62% ±<br>5.0                  | 64% ±<br>8.0                 |
| <b>BA</b>              | 70% ±<br>4.0          | 67% ±<br>9.0         | 58% ±<br>5.0         | 53%<br>± 9.0        | 69% ±<br>5.0                 | 70% ±<br>9.0                | 61% ±<br>5.0                  | 60% ±<br>10.0                |
| <b>MCC</b>             | 0.39 ±<br>0.09        | 0.3 ±<br>0.2         | 0.15 ±<br>0.1        | 0.08 ±<br>0.2       | 0.39 ±<br>0.1                | 0.4 ±<br>0.2                | 0.22 ±<br>0.1                 | 0.3 ±<br>0.2                 |
| <b>AUC</b>             | 0.791 ±<br>0.01       | 0.868<br>± 0.01      | 0.643 ±<br>0.01      | 0.627<br>± 0.01     | 0.728 ±<br>0.01              | 0.816 ±<br>0.01             | 0.786 ±<br>0.01               | 1 ± 0.01                     |
| <b>SE</b>              | 0.7                   | 0.8                  | 0.625                | 0.8                 | 0.6                          | 0.8                         | 0.6                           | 0.7                          |
| <b>SP</b>              | 0.6949                | 0.533                | 0.525                | 0.266               | 0.779                        | 0.6                         | 0.627                         | 0.6                          |
| <b>Dragon v. 7</b>     |                       |                      |                      |                     |                              |                             |                               |                              |
| <b>Accuracy</b>        | 69% ±<br>5.0          | 60% ±<br>8.0         | 66% ±<br>5.0         | 56%<br>± 8.0        | 74% ±<br>4.0                 | 68% ±<br>8.0                | 67% ±<br>5.0                  | 60% ±<br>8.0                 |
| <b>BA</b>              | 66% ±<br>5.0          | 60% ±<br>10.0        | 66% ±<br>5.0         | 60%<br>± 9.0        | 72% ±<br>4.0                 | 70% ±<br>10.0               | 67% ±<br>5.0                  | 60% ±<br>10.0                |
| <b>MCC</b>             | 0.34 ±<br>0.1         | 0.2 ±<br>0.2         | 0.3 ±<br>0.1         | 0.2 ±<br>0.2        | 0.45 ±<br>0.09               | 0.4 ±<br>0.2                | 0.34 ±<br>0.09                | 0.2 ±<br>0.2                 |
| <b>AUC</b>             | 0.778 ±<br>0.01       | 0.789<br>± 0.01      | 0.781 ±<br>0.01      | 0.667<br>± 0.01     | 0.728 ±<br>0.01              | 0.675 ±<br>0.01             | 0.787 ±<br>0.01               | 0.737 ±<br>0.01              |
| <b>SE</b>              | 0.55                  | 0.5                  | 0.65                 | 0.8                 | 0.625                        | 0.7                         | 0.7                           | 0.5                          |
| <b>SP</b>              | 0.779                 | 0.666                | 0.661                | 0.4                 | 0.813                        | 0.66                        | 0.644                         | 0.66                         |
| <b>ISIDA fragments</b> |                       |                      |                      |                     |                              |                             |                               |                              |
| <b>Accuracy</b>        | 69% ±<br>5.0          | 72% ±<br>8.0         | 57% ±<br>5.0         | 50%<br>± 10.0       | 77% ±<br>4.0                 | 72% ±<br>8.0                | 71% ±<br>4.0                  | 64% ±<br>8.0                 |
| <b>BA</b>              | 67% ±<br>5.0          | 73% ±<br>9.0         | 58% ±<br>5.0         | 53%<br>± 9.0        | 75% ±<br>4.0                 | 73% ±<br>9.0                | 69% ±<br>5.0                  | 60% ±<br>10.0                |
| <b>MCC</b>             | 0.34 ±<br>0.1         | 0.5 ±<br>0.2         | 0.1 ±<br>0.1         | 0.08 ±<br>0.2       | 0.51 ±<br>0.09               | 0.5 ±<br>0.2                | 0.38 ±<br>0.09                | 0.3 ±<br>0.2                 |
| <b>AUC</b>             | 0.657 ±<br>0.01       | 0.798<br>± 0.01      | 0.643 ±<br>0.01      | 0.627<br>± 0.01     | 0.728 ±<br>0.01              | 0.675 ±<br>0.01             | 0.724 ±<br>0.01               | 0.702 ±<br>0.01              |



|                  |              |              |              |              |                     |                     |              |              |
|------------------|--------------|--------------|--------------|--------------|---------------------|---------------------|--------------|--------------|
| <b>SE</b>        | 0.575        | 0.8          | 0.625        | 0.8          | 0.675               | 0.8                 | 0.575        | 0.6          |
| <b>SP</b>        | 0.76         | 0.66         | 0.525        | 0.266        | 0.83                | 0.66                | 0.79         | 0.66         |
| <b>CDK 2.0</b>   |              |              |              |              |                     |                     |              |              |
| <b>Accuracy</b>  | 72% ± 5.0    | 74% ± 9.0    | 61% ± 5.0    | 70% ± 9.0    | <b>73% ± 4.0</b>    | <b>78% ± 9.0</b>    | 71% ± 5.0    | 57% ± 9.0    |
| <b>BA</b>        | 70% ± 5.0    | 73% ± 9.0    | 59% ± 5.0    | 68% ± 10.0   | <b>71% ± 5.0</b>    | <b>77% ± 9.0</b>    | 70% ± 5.0    | 55% ± 10.0   |
| <b>MCC</b>       | 0.4 ± 0.09   | 0.5 ± 0.2    | 0.2 ± 0.1    | 0.4 ± 0.2    | <b>0.43 ± 0.1</b>   | <b>0.6 ± 0.2</b>    | 0.39 ± 0.1   | 0.1 ± 0.2    |
| <b>AUC</b>       | 0.747 ± 0.01 | 0.958 ± 0.01 | 0.693 ± 0.01 | 0.719 ± 0.01 | <b>0.799 ± 0.01</b> | <b>0.771 ± 0.01</b> | 0.753 ± 0.01 | 0.854 ± 0.01 |
| <b>SE</b>        | 0.6          | 0.7          | 0.5          | 0.6          | <b>0.625</b>        | <b>0.7</b>          | 0.65         | 0.4          |
| <b>SP</b>        | 0.79         | 0.769        | 0.677        | 0.66         | <b>0.796</b>        | <b>0.846</b>        | 0.745        | 0.692        |
| <b>Inductive</b> |              |              |              |              |                     |                     |              |              |
| <b>Accuracy</b>  | 70% ± 5.0    | 60% ± 10.0   | 70% ± 5.0    | 52% ± 10.0   | 72% ± 5.0           | 60% ± 10.0          | 63% ± 5.0    | 50% ± 10.0   |
| <b>BA</b>        | 67% ± 5.0    | 60% ± 10.0   | 67% ± 5.0    | 50% ± 10.0   | 70% ± 5.0           | 60% ± 10.0          | 61% ± 5.0    | 50% ± 10.0   |
| <b>MCC</b>       | 0.36 ± 0.1   | 0.1 ± 0.2    | 0.36 ± 0.1   | 0 ± 0.2      | 0.41 ± 0.1          | 0.2 ± 0.2           | 0.23 ± 0.1   | 0 ± 0.2      |
| <b>AUC</b>       | 0.825 ± 0.01 | 0.737 ± 0.01 | 0.803 ± 0.01 | 0.588 ± 0.01 | 0.748 ± 0.01        | 0.618 ± 0.01        | 0.718 ± 0.01 | 0.421 ± 0.01 |
| <b>SE</b>        | 0.55         | 0.6          | 0.55         | 0.4          | 0.625               | 0.5                 | 0.55         | 0.4          |
| <b>SP</b>        | 0.796        | 0.53         | 0.796        | 0.6          | 0.7796              | 0.66                | 0.677        | 0.6          |
| <b>MERA</b>      |              |              |              |              |                     |                     |              |              |
| <b>Accuracy</b>  | 73% ± 4.0    | 64% ± 8.0    | 63% ± 5.0    | 56% ± 8.0    | 69% ± 4.0           | 64% ± 8.0           | 70% ± 4.0    | 60% ± 8.0    |
| <b>BA</b>        | 73% ± 5.0    | 62% ± 10.0   | 65% ± 5.0    | 60% ± 10.0   | 68% ± 5.0           | 63% ± 10.0          | 68% ± 5.0    | 60% ± 10.0   |
| <b>MCC</b>       | 0.45 ± 0.09  | 0.2 ± 0.2    | 0.29 ± 0.09  | 0.2 ± 0.2    | 0.37 ± 0.09         | 0.3 ± 0.2           | 0.38 ± 0.09  | 0.2 ± 0.2    |
| <b>AUC</b>       | 0.889 ± 0.01 | 0.737 ± 0.01 | 0.747 ± 0.01 | 0.566 ± 0.01 | 0.728 ± 0.01        | 0.566 ± 0.01        | 0.792 ± 0.01 | 0.842 ± 0.01 |
| <b>SE</b>        | 0.67         | 0.5          | 0.725        | 0.7          | 0.625               | 0.6                 | 0.575        | 0.5          |
| <b>SP</b>        | 0.775        | 0.733        | 0.568        | 0.466        | 0.741               | 0.66                | 0.793        | 0.66         |
| <b>MERSY</b>     |              |              |              |              |                     |                     |              |              |
| <b>Accuracy</b>  | 68% ± 5.0    | 68% ± 8.0    | 64% ± 5.0    | 68% ± 8.0    | 64% ± 5.0           | 60% ± 10.0          | 62% ± 5.0    | 64% ± 10.0   |
| <b>BA</b>        | 67% ± 5.0    | 70% ± 9.0    | 63% ± 5.0    | 70% ± 10.0   | 62% ± 5.0           | 60% ± 10.0          | 62% ± 5.0    | 65% ± 10.0   |
| <b>MCC</b>       | 0.33 ± 0.09  | 0.4 ± 0.2    | 0.26 ± 0.1   | 0.3 ± 0.2    | 0.2 ± 0.1           | 0.2 ± 0.2           | 0.2 ± 0.1    | 0.3 ± 0.2    |
| <b>AUC</b>       | 0.783 ± 0.01 | 0.833 ± 0.01 | 0.669 ± 0.01 | 0.921 ± 0.01 | 0.568 ± 0.01        | 0.754 ± 0.01        | 0.689 ± 0.01 | 0.833 ± 0.01 |
| <b>SE</b>        | 0.625        | 0.8          | 0.6          | 0.6          | 0.55                | 0.5                 | 0.625        | 0.7          |
| <b>SP</b>        | 0.711        | 0.6          | 0.661        | 0.733        | 0.694               | 0.66                | 0.61         | 0.6          |
| <b>Chemaxon</b>  |              |              |              |              |                     |                     |              |              |
| <b>Accuracy</b>  | 69% ± 5.0    | 62% ± 8.0    | 62% ± 5.0    | 50% ± 10.0   | <b>70% ± 5.0</b>    | <b>75% ± 8.0</b>    | 63% ± 5.0    | 40% ± 10.0   |

|                      |                         |                         |                 |                 |                         |                         |                 |                 |
|----------------------|-------------------------|-------------------------|-----------------|-----------------|-------------------------|-------------------------|-----------------|-----------------|
| <b>BA</b>            | 68% ±<br>5.0            | 60% ±<br>10.0           | 60% ±<br>5.0    | 60% ±<br>10.0   | <b>69% ±<br/>5.0</b>    | <b>73% ±<br/>9.0</b>    | 62% ±<br>5.0    | 40% ±<br>10.0   |
| <b>MCC</b>           | 0.37 ±<br>0.1           | 0.2 ±<br>0.2            | 0.2 ±<br>0.1    | 0.1 ±<br>0.2    | <b>0.38 ±<br/>0.1</b>   | <b>0.5 ±<br/>0.2</b>    | 0.24 ±<br>0.1   | -0.2 ±<br>0.2   |
| <b>AUC</b>           | 0.762 ±<br>0.01         | 0.577 ±<br>0.01         | 0.65 ±<br>0.01  | 0.487 ±<br>0.01 | <b>0.761 ±<br/>0.01</b> | <b>0.635 ±<br/>0.01</b> | 0.702 ±<br>0.01 | 0.333 ±<br>0.01 |
| <b>SE</b>            | 0.625                   | 0.6                     | 0.5             | 0.6             | <b>0.6</b>              | <b>0.6</b>              | 0.55            | 0.4             |
| <b>SP</b>            | 0.741                   | 0.642                   | 0.706           | 0.5             | <b>0.775</b>            | <b>0.857</b>            | 0.689           | 0.428           |
| <b>QNPR</b>          |                         |                         |                 |                 |                         |                         |                 |                 |
| <b>Accuracy</b>      | <b>65% ±<br/>5.0</b>    | <b>72% ±<br/>8.0</b>    | 65% ±<br>5.0    | 56% ±<br>10.0   | 74% ±<br>5.0            | 64% ±<br>8.0            | 69% ±<br>5.0    | 48% ±<br>8.0    |
| <b>BA</b>            | <b>63% ±<br/>5.0</b>    | <b>70% ±<br/>10.0</b>   | 66% ±<br>5.0    | 60% ±<br>9.0    | 72% ±<br>5.0            | 63% ±<br>10.0           | 67% ±<br>5.0    | 50% ±<br>10.0   |
| <b>MCC</b>           | <b>0.26 ±<br/>0.1</b>   | <b>0.4 ±<br/>0.2</b>    | 0.32 ±<br>0.09  | 0.2 ±<br>0.2    | 0.45 ±<br>0.09          | 0.3 ±<br>0.2            | 0.34 ±<br>0.1   | 0 ± 0.2         |
| <b>AUC</b>           | <b>0.701 ±<br/>0.01</b> | <b>0.605 ±<br/>0.01</b> | 0.631 ±<br>0.01 | 0.618 ±<br>0.01 | 0.674 ±<br>0.01         | 0.592 ±<br>0.01         | 0.731 ±<br>0.01 | 0.557 ±<br>0.01 |
| <b>SE</b>            | <b>0.55</b>             | <b>0.6</b>              | 0.75            | 0.8             | 0.65                    | 0.6                     | 0.575           | 0.6             |
| <b>SP</b>            | <b>0.711</b>            | <b>0.8</b>              | 0.576           | 0.4             | 0.796                   | 0.66                    | 0.762           | 0.4             |
| <b>Spectrophores</b> |                         |                         |                 |                 |                         |                         |                 |                 |
| <b>Accuracy</b>      | <b>70% ±<br/>5.0</b>    | <b>68% ±<br/>8.0</b>    | 57% ±<br>5.0    | 52% ±<br>10.0   | 67% ±<br>5.0            | 64% ±<br>8.0            | 60% ±<br>5.0    | 68% ±<br>8.0    |
| <b>BA</b>            | <b>67% ±<br/>5.0</b>    | <b>67% ±<br/>10.0</b>   | 54% ±<br>5.0    | 50% ±<br>10.0   | 62% ±<br>5.0            | 60% ±<br>10.0           | 56% ±<br>5.0    | 68% ±<br>10.0   |
| <b>MCC</b>           | <b>0.4 ±<br/>0.1</b>    | <b>0.3 ±<br/>0.2</b>    | 0.08 ±<br>0.1   | 0.03 ±<br>0.2   | 0.3 ±<br>0.1            | 0.2 ±<br>0.2            | 0.12 ±<br>0.1   | 0.4 ±<br>0.2    |
| <b>AUC</b>           | <b>0.792 ±<br/>0.01</b> | <b>0.833 ±<br/>0.01</b> | 0.694 ±<br>0.01 | 0.478 ±<br>0.01 | 0.682 ±<br>0.01         | 0.509 ±<br>0.01         | 0.659 ±<br>0.01 | 0.596 ±<br>0.01 |
| <b>SE</b>            | <b>0.55</b>             | <b>0.6</b>              | 0.4             | 0.5             | 0.4                     | 0.5                     | 0.35            | 0.7             |
| <b>SP</b>            | <b>0.796</b>            | <b>0.733</b>            | 0.677           | 0.533           | 0.847                   | 0.733                   | 0.762           | 0.66            |

**Supplementary Table 9.** List of predicted compound from consensus modelling

| NAME               | hOCT2 | hOCT1 |
|--------------------|-------|-------|
| Prucalopride       | -     | yes   |
| Amifampridine      | yes   | -     |
| Stiripentol        | yes   | -     |
| Migalastat         | yes   | -     |
| Palonosterone      | yes   | -     |
| Secnidazole        | yes   | yes   |
| Benzimidazole      | yes   | yes   |
| Meropenam          | yes   | -     |
| Edaravone          | yes   | -     |
| Flucuclovine       | yes   | -     |
| Brivaracetam       | yes   | yes   |
| Tipiracil          | yes   | yes   |
| Uridine Triacetate | yes   | -     |

**Supplementary Table 10.** Docking score with interaction of 5 FDA drugs which may act as possible substrates for hOCT1

| No.          | Tetraethylammonium (TEA)                                                                                                                                                                                                                                                                                                                                                                                                                                 | Mitochondrial processing peptidase (MPP+)       |
|--------------|----------------------------------------------------------------------------------------------------------------------------------------------------------------------------------------------------------------------------------------------------------------------------------------------------------------------------------------------------------------------------------------------------------------------------------------------------------|-------------------------------------------------|
|              | <p><b>Interactions</b></p> <ul style="list-style-type: none"> <li><span style="color: green;">■</span> van der Waals</li> <li><span style="color: red;">■</span> Conventional Hydrogen Bond</li> <li><span style="color: blue;">■</span> Carbon Hydrogen Bond</li> <li><span style="color: green;">■</span> Pi-Donor Hydrogen Bond</li> <li><span style="color: pink;">■</span> Alkyl</li> <li><span style="color: purple;">■</span> Pi-Alkyl</li> </ul> |                                                 |
| Prucalopride | <p style="text-align: right;">-7.6 kcal/mol</p>                                                                                                                                                                                                                                                                                                                                                                                                          | <p style="text-align: right;">-7.5 kcal/mol</p> |

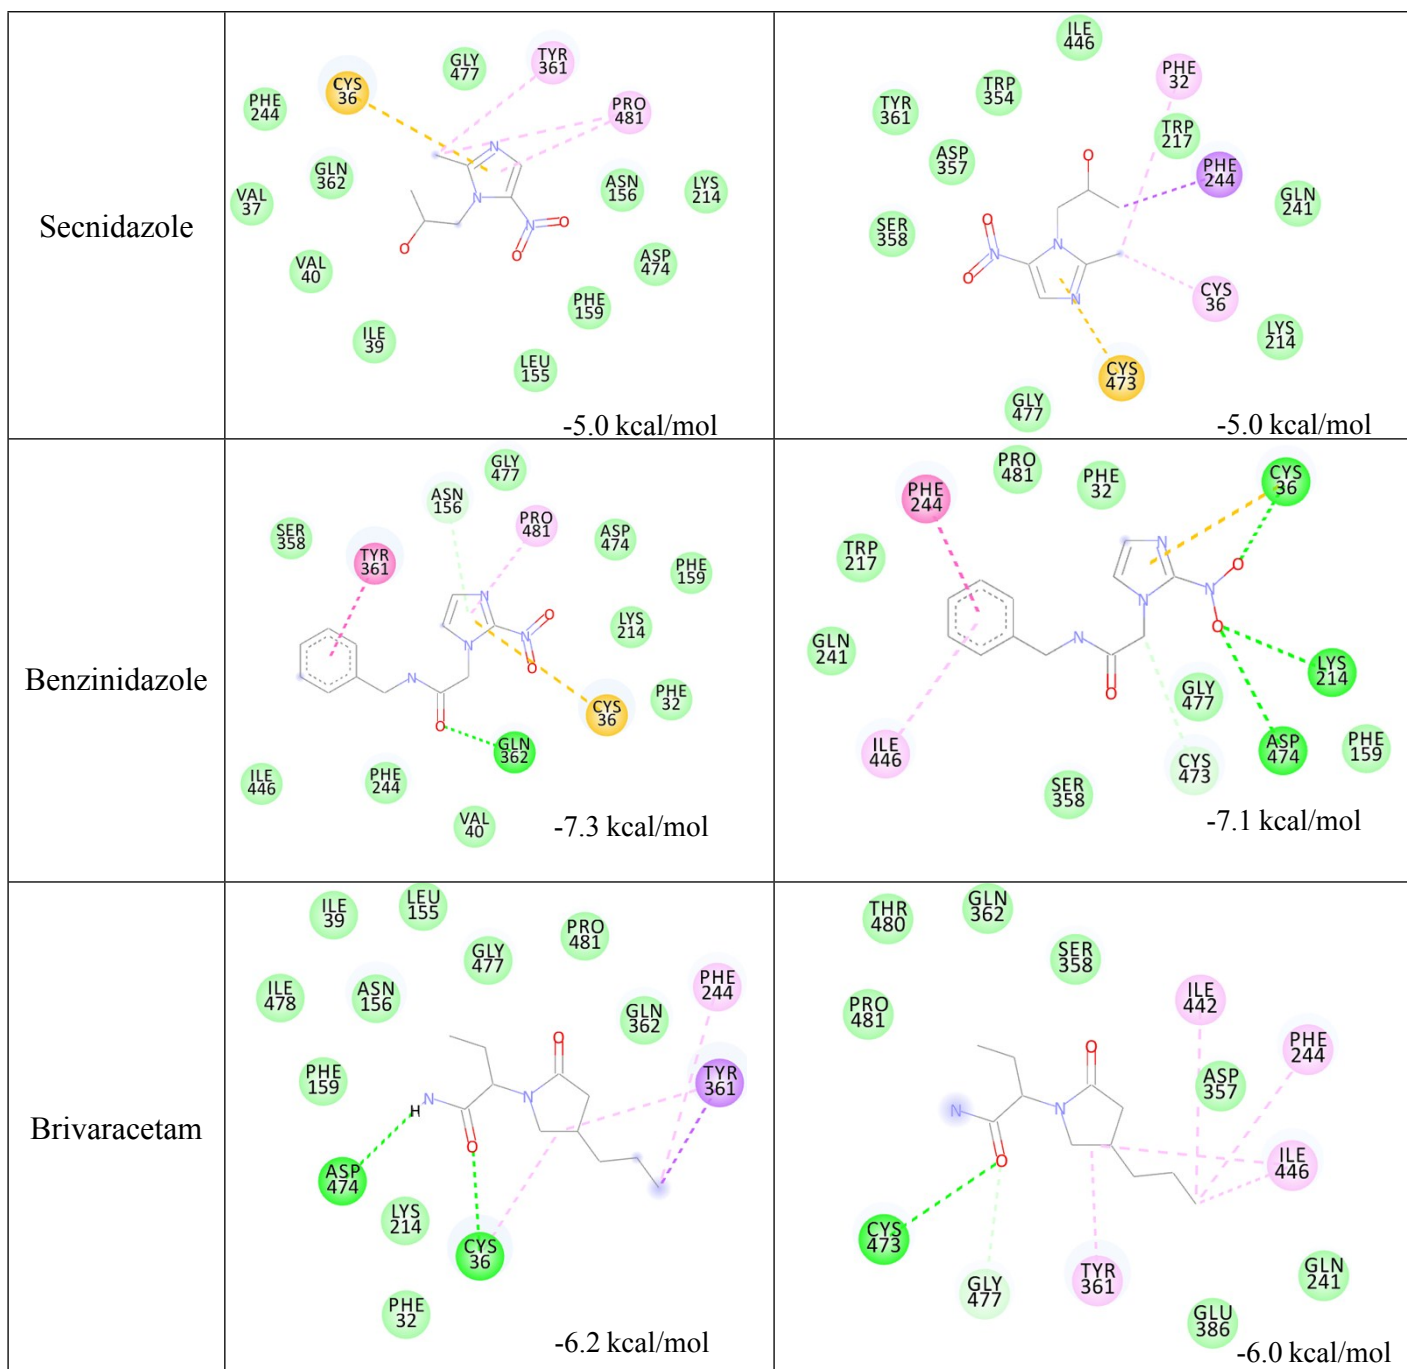

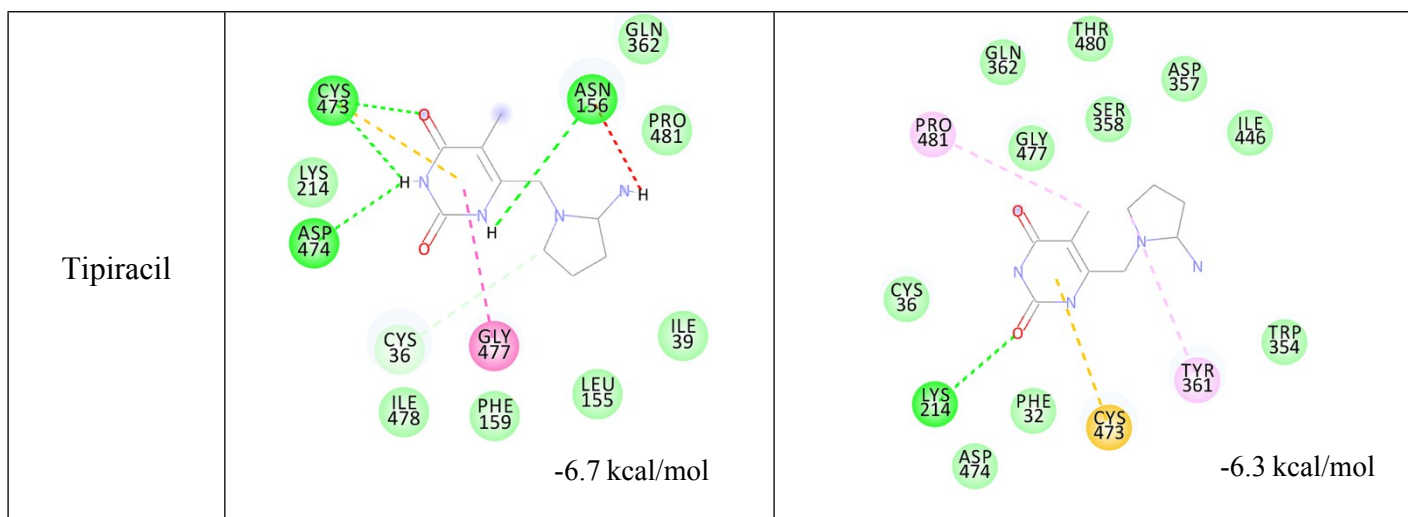

**Supplementary Table 11.** Docking score with interaction of 12 FDA drugs which may act as possible substrates for hOCT2

| No.           | Tetraethylammonium (TEA) | Mitochondrial processing peptidase (MPP+) |
|---------------|--------------------------|-------------------------------------------|
| Amifampridine | <p>-4.5 kcal/mol</p>     | <p>-4.2 kcal/mol</p>                      |
| Stiripentol   | <p>-7.4 kcal/mol</p>     | <p>-7.1 kcal/mol</p>                      |



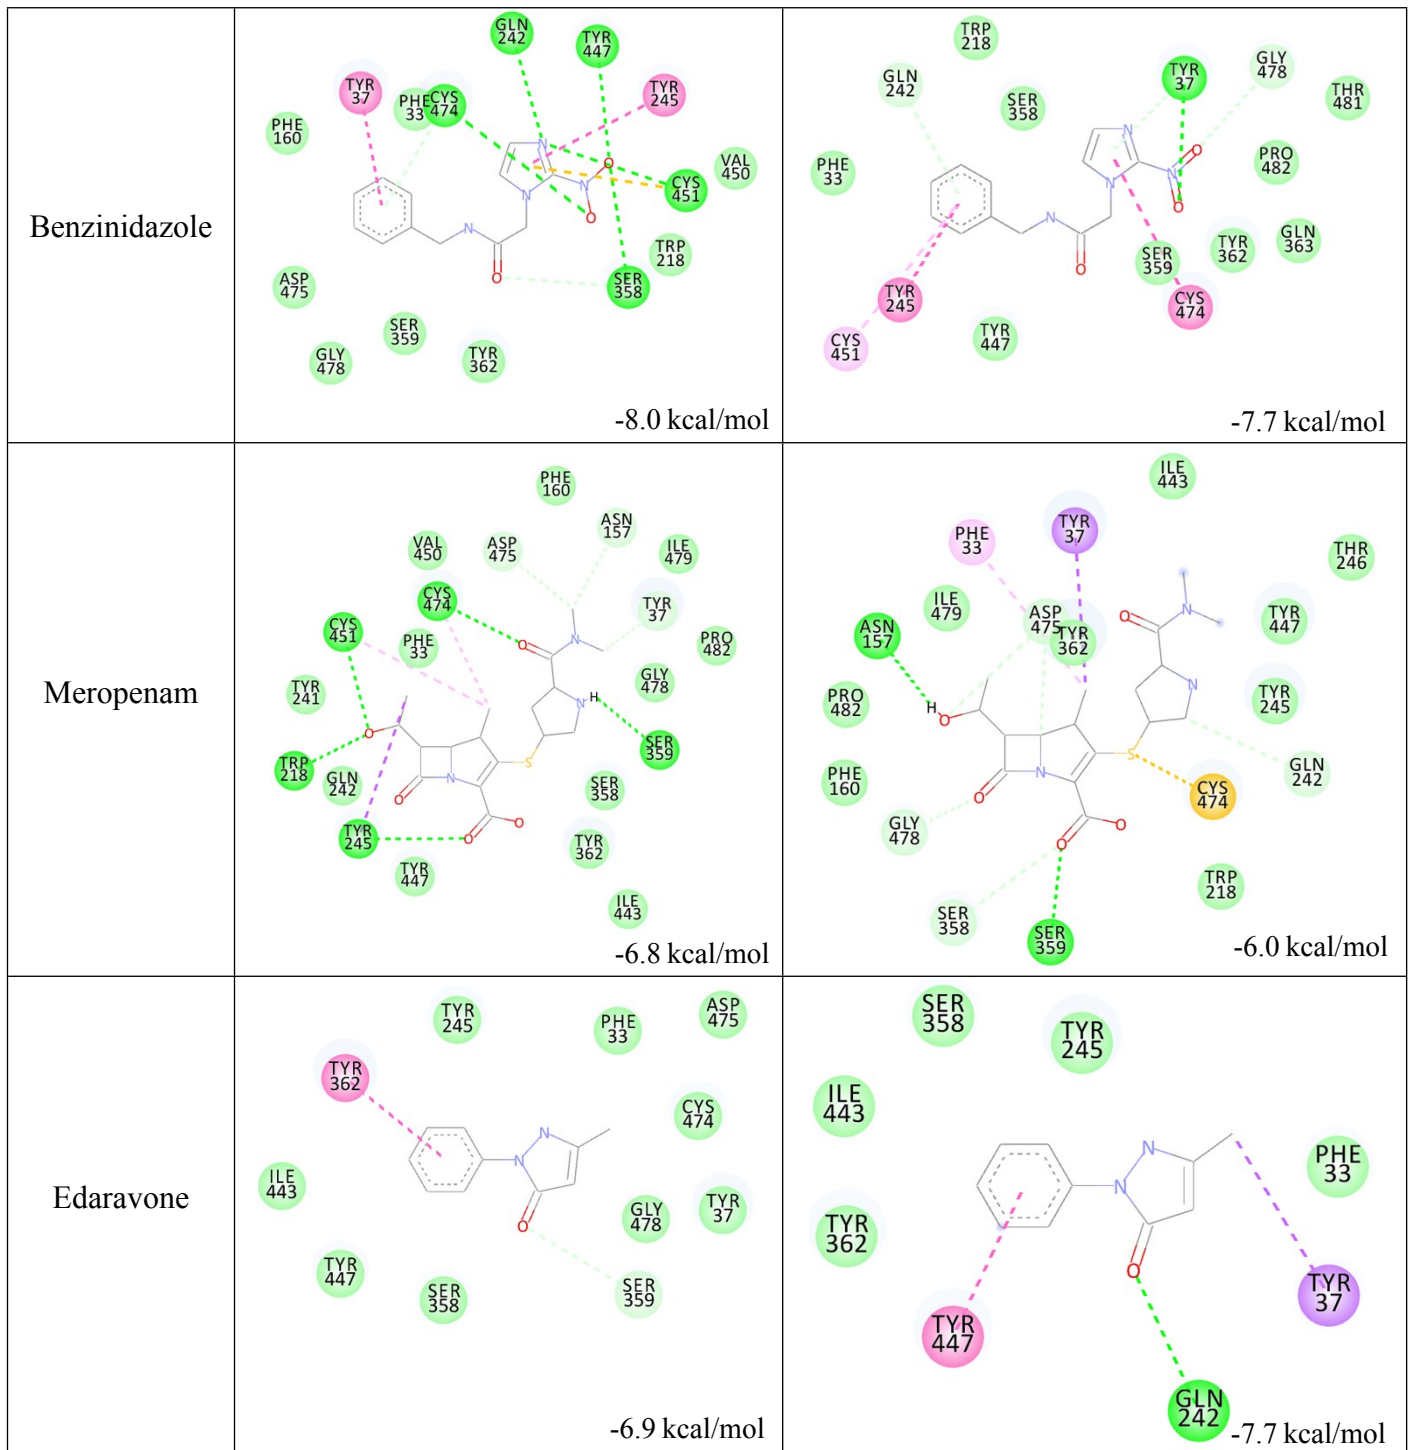



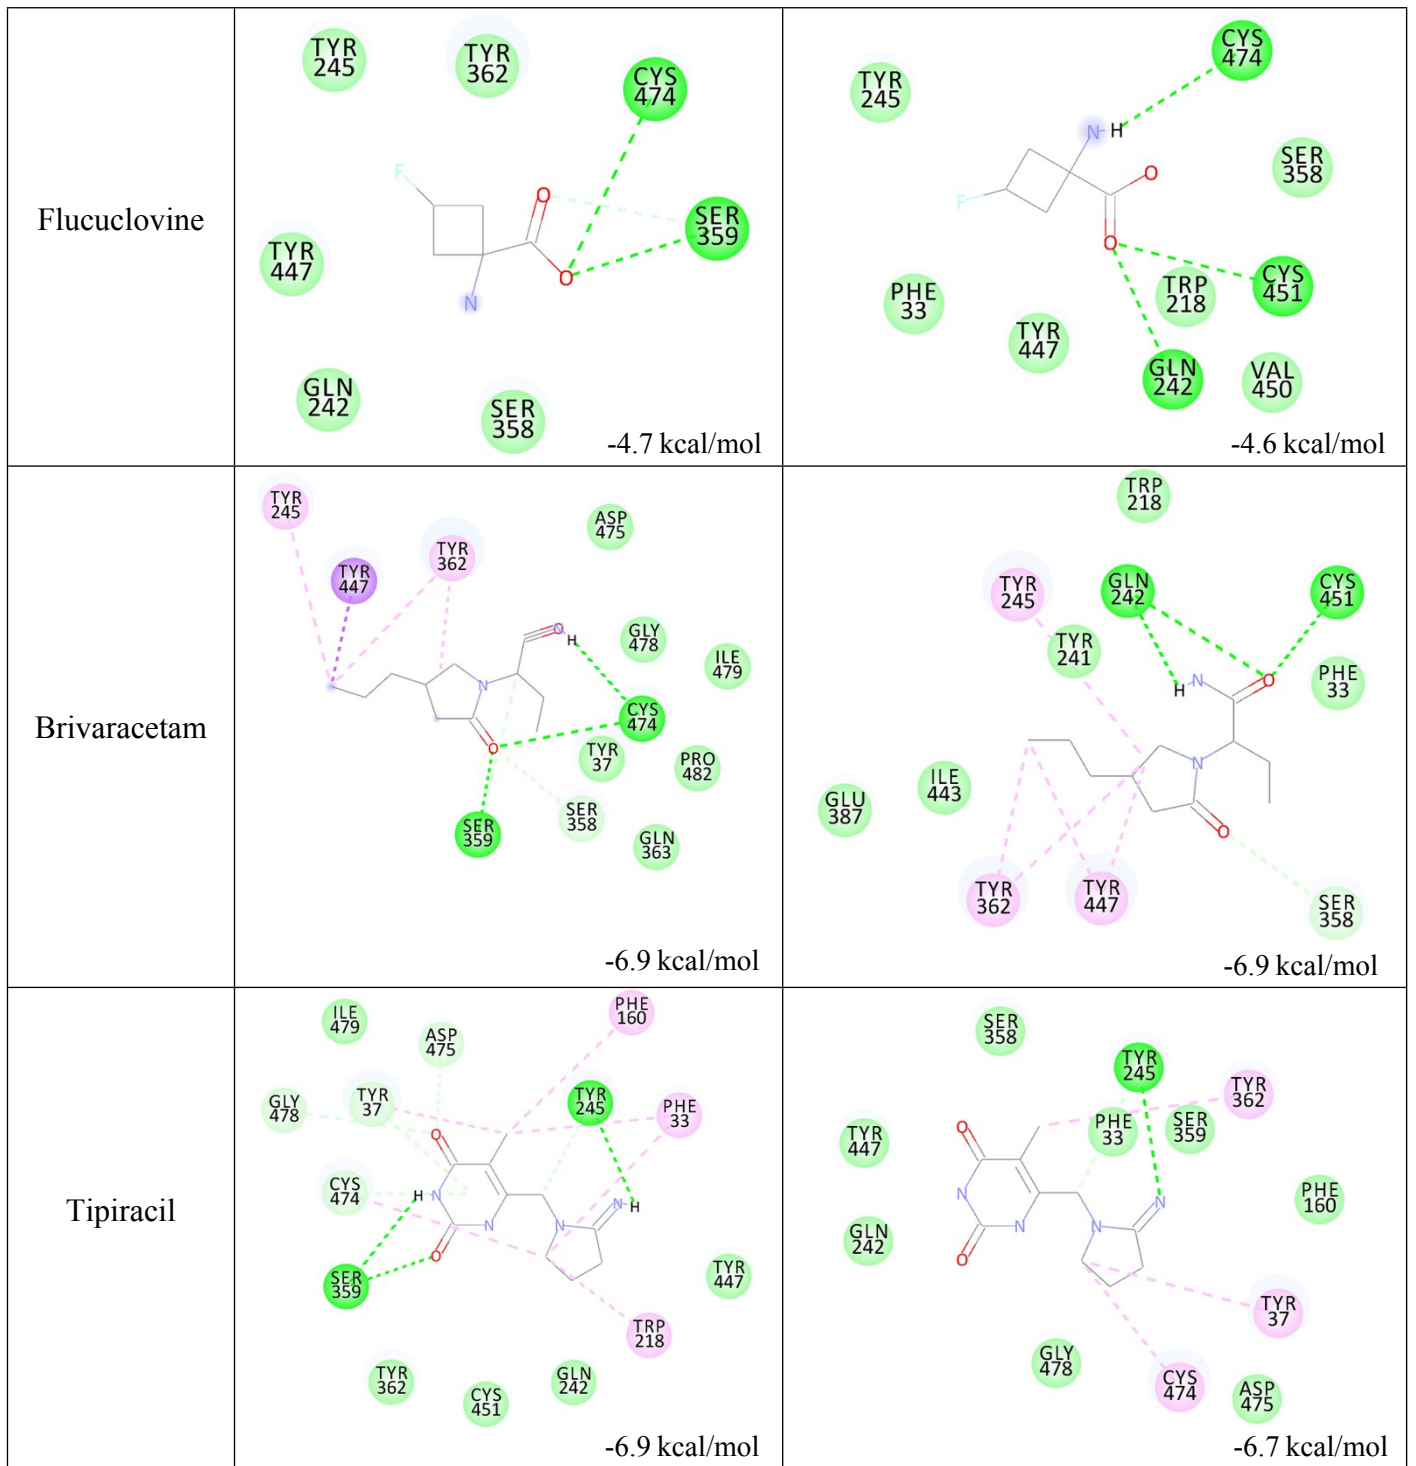



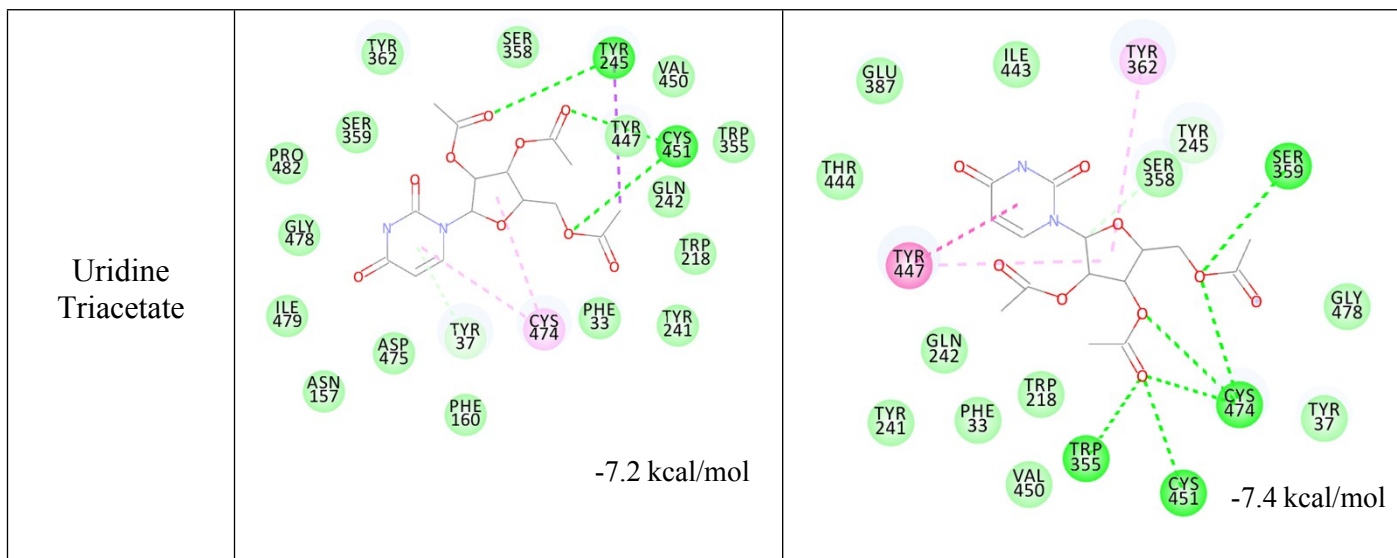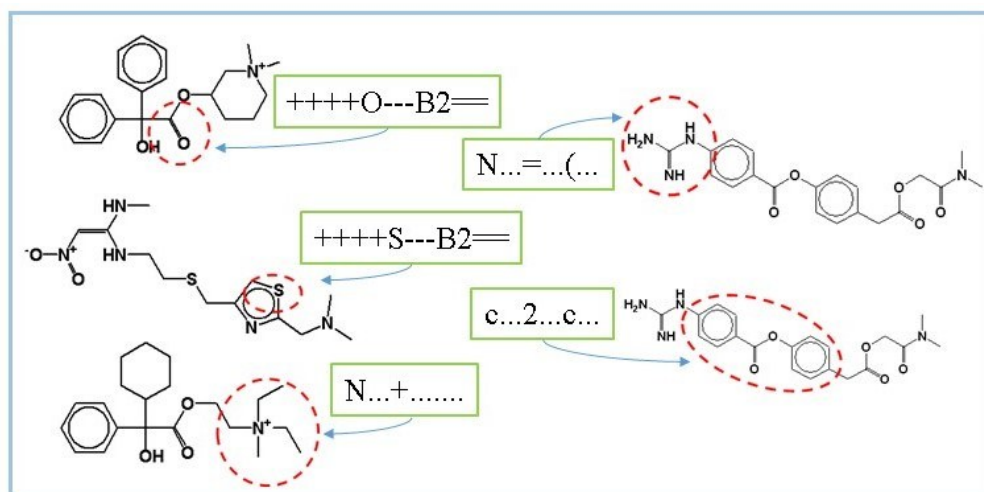

Supplementary Figure 1. Promoters for increase of hOCT1 substrate activity

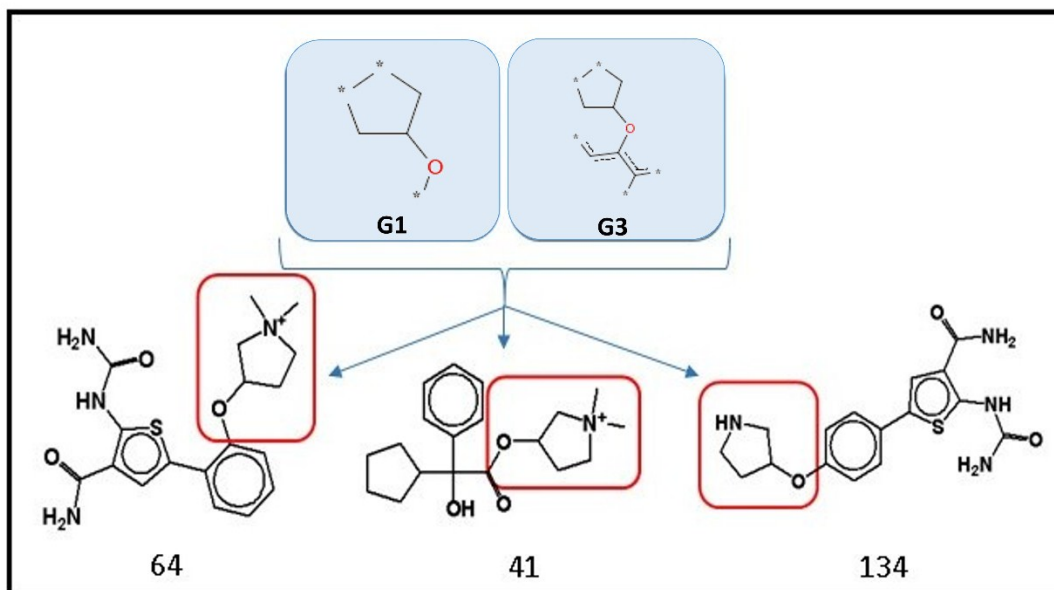

**Supplementary Figure 2.** Good fingerprint G1 and G3 for hOCT1

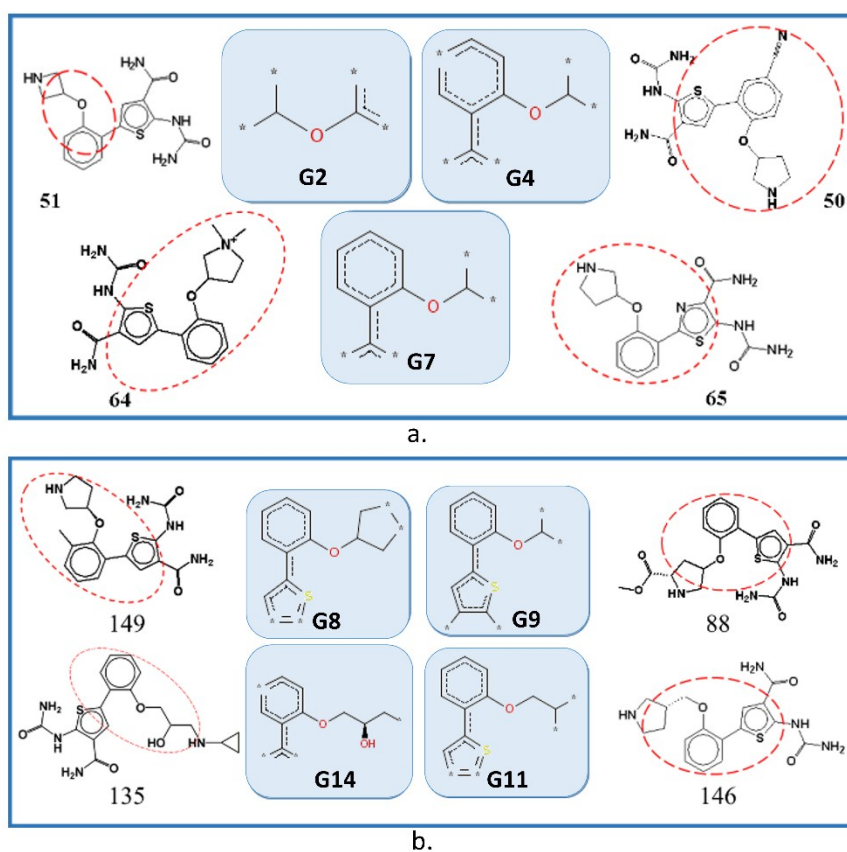

**Supplementary Figure 3. a)** Good fingerprint G2,G4 and G7 for hOCT1

**b)** Examples representing fingerprint G8, G9, G11 and G14 for hOCT1

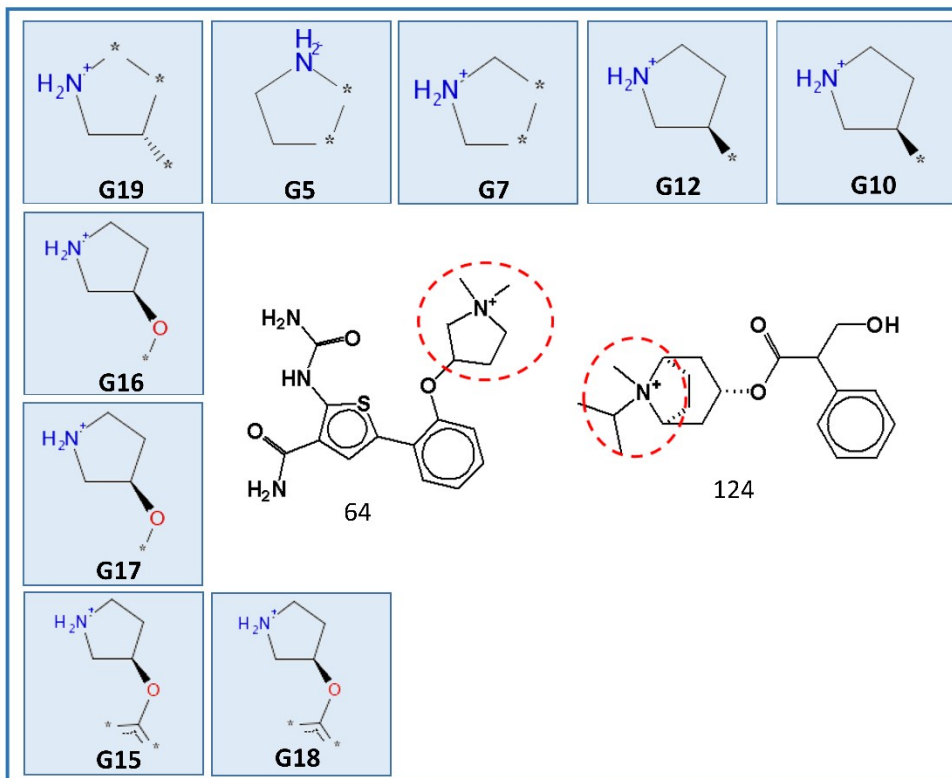

**Supplementary Figure 4.** Good fingerprint G5, G7, G10, G12, G15, G16, G17, G18, and G19 for hOCT1

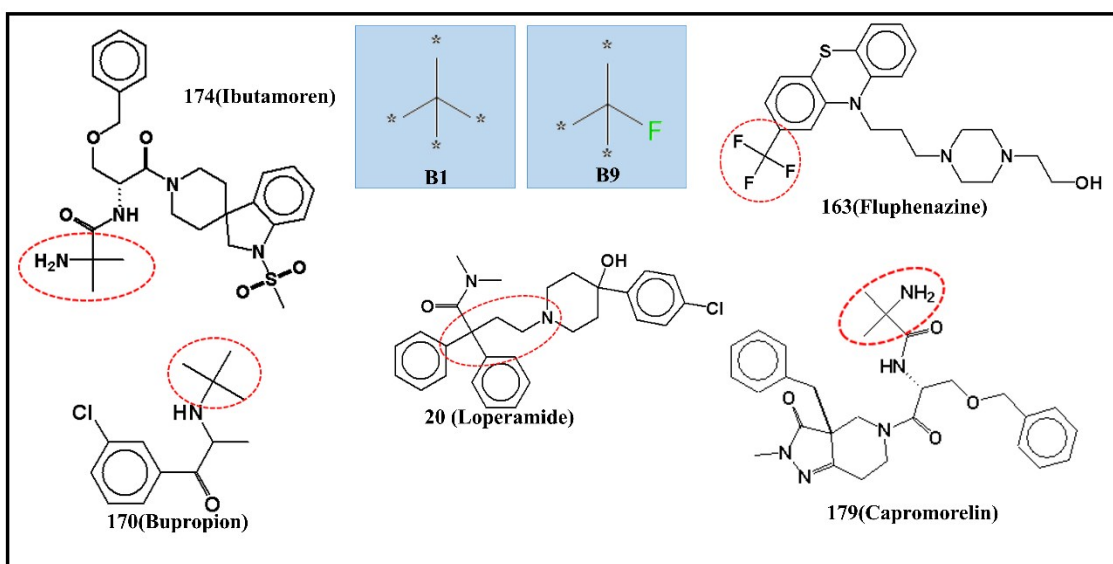

**Supplementary Figure 5.** Bad fingerprint B1 and B9 for hOCT1

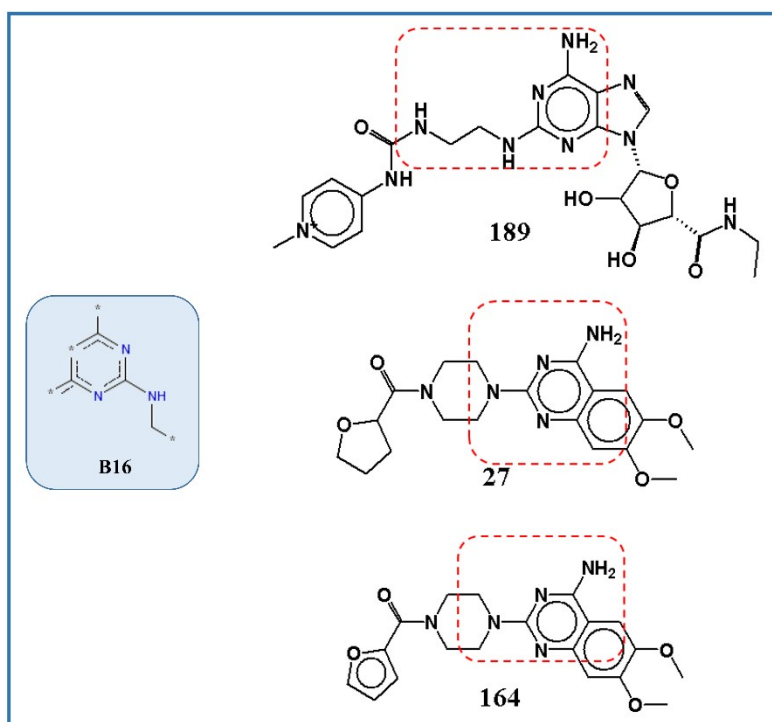

Supplementary Figure 6. Bad fingerprint B16 for hOCT1

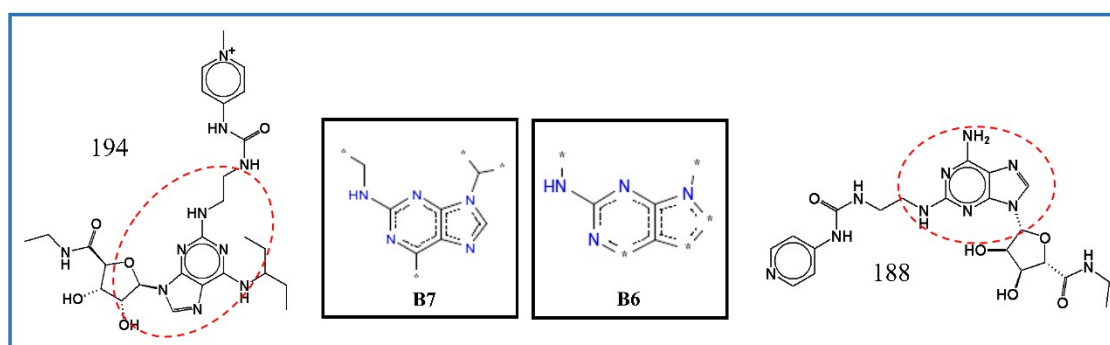

Supplementary Figure 7. Bad fingerprint B6 and B7 for hOCT1

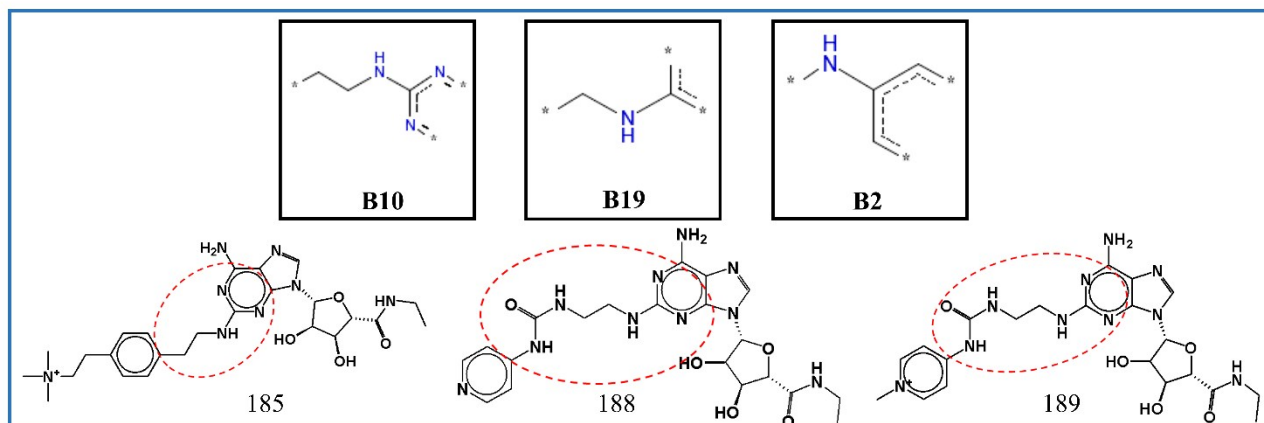

**Supplementary Figure 8.** Bad fingerprint B2, B10, and B19 for hOCT1

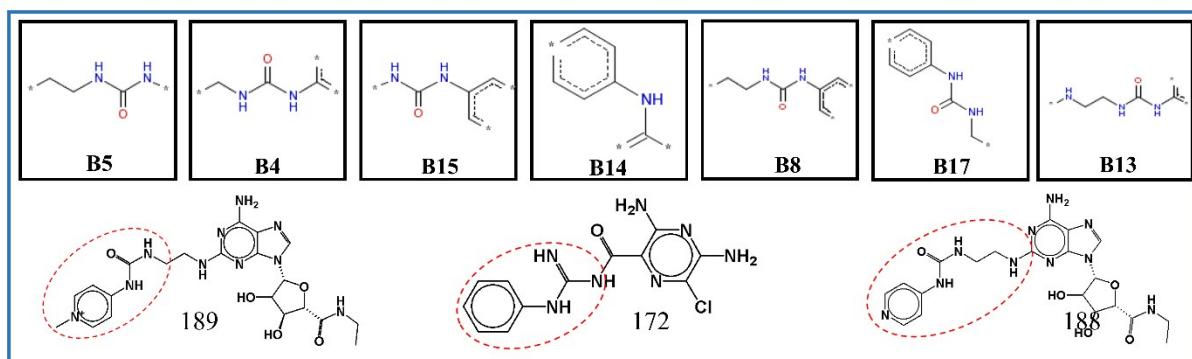

**Supplementary Figure 9.** Bad fingerprint B4, B5, B8, B13, B14, B15, and B17 for hOCT1

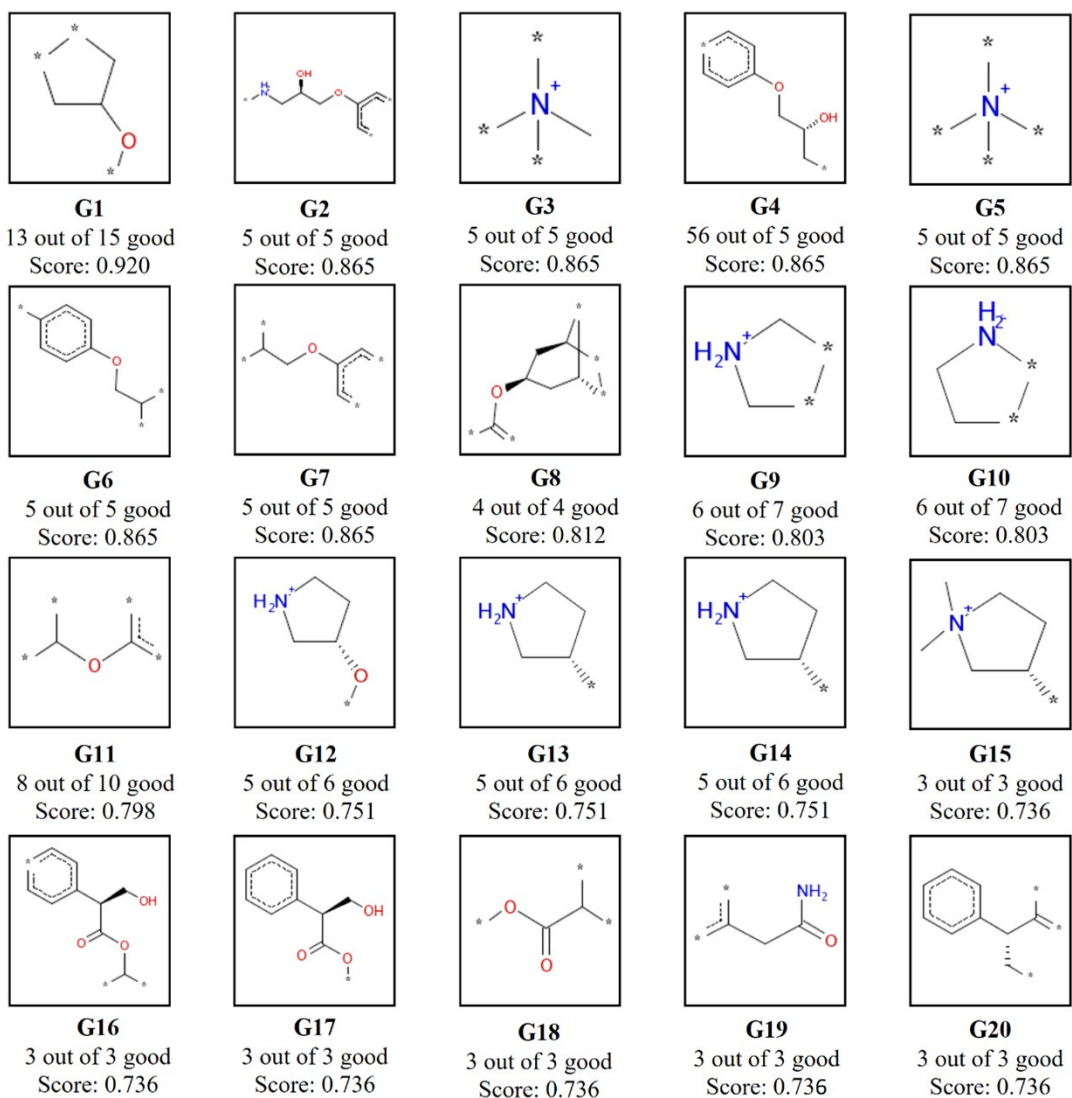

**Supplementary Figure 10.** Good molecular fingerprints for substrate of hOCT1 and hOCT2 from Bayesian classification

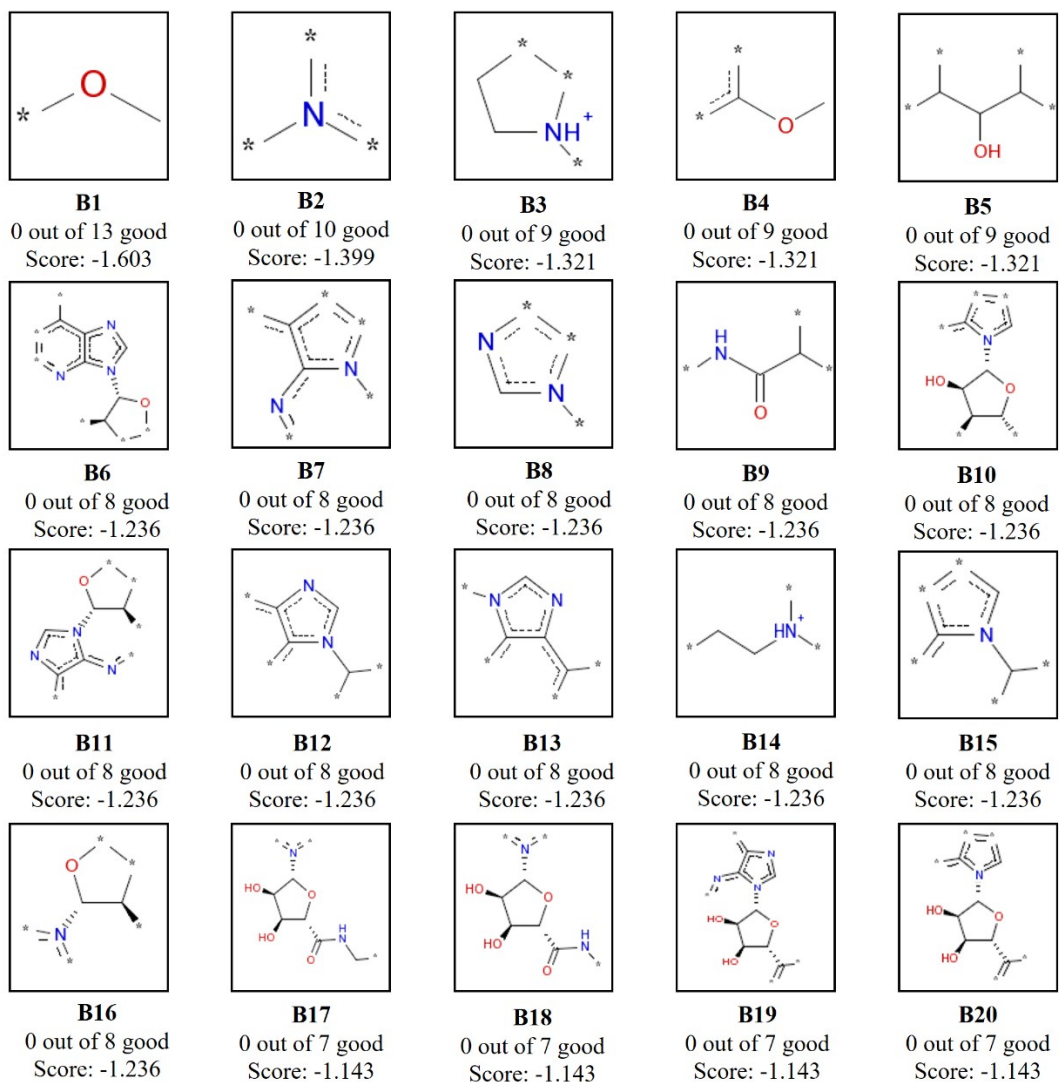

**Supplementary Figure 11.** Bad molecular fingerprints for non-substrate of hOCT1 and hOCT2 from Bayesian classification



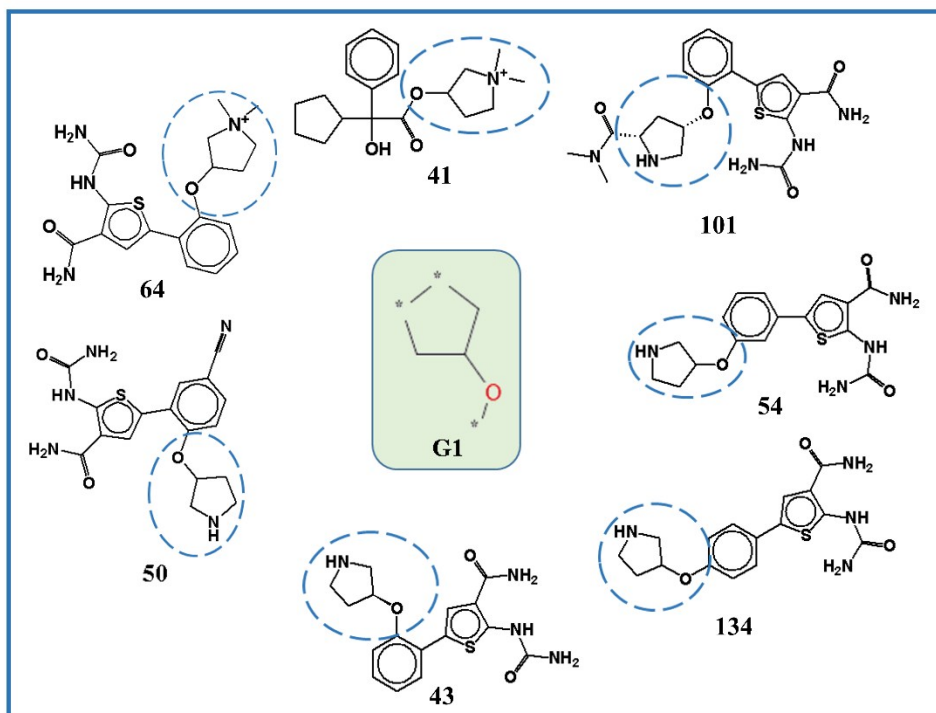

**Supplementary Figure 12.** Good fingerprint G1 for combined hOCT1 and hOCT2

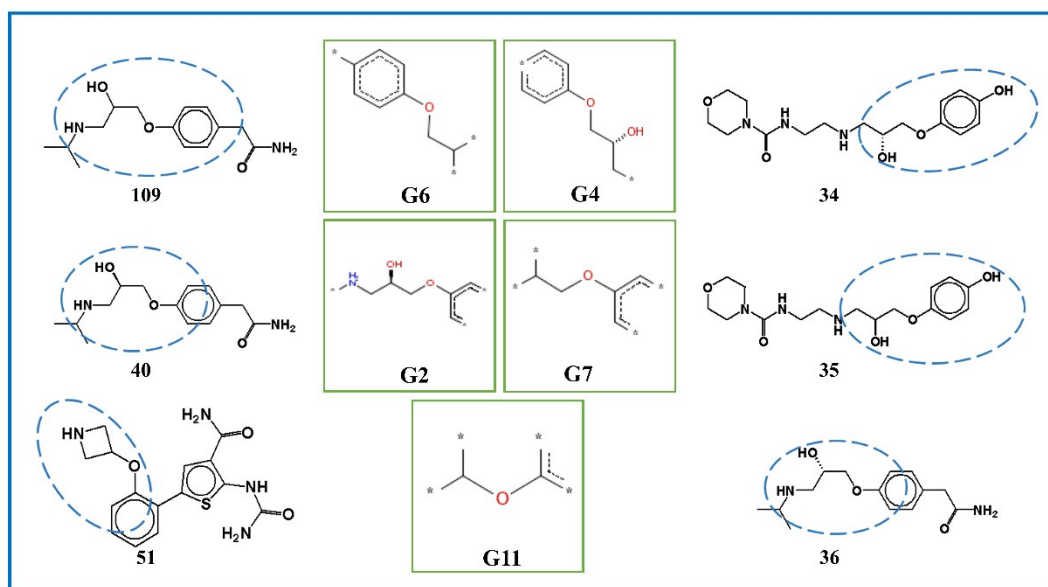

**Supplementary Figure 13.** Good fingerprint G2, G4, G6, G7, and G11 for combined hOCT1 and hOCT2



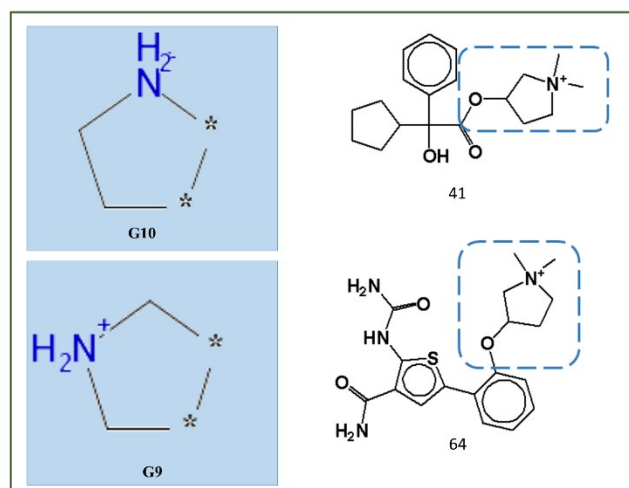

**Supplementary Figure 14.** Good fingerprint G9 and G10 for combined hOCT1 and hOCT2

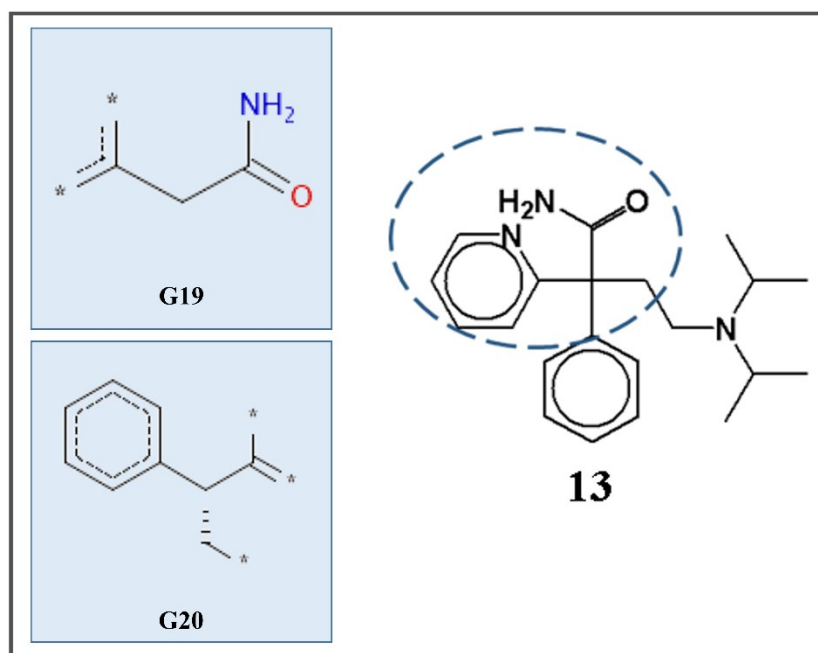

**Supplementary Figure 15.** Good fingerprint G19, and G20 for combined hOCT1 and hOCT2

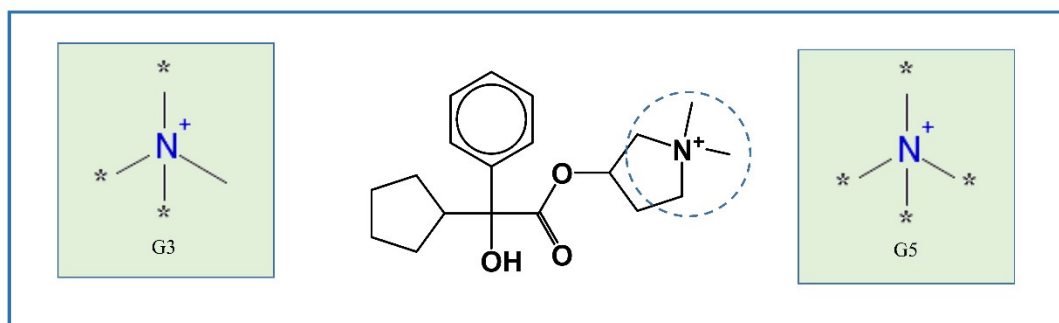

**Supplementary Figure 16.** Good fingerprint G3 and G5 for combined hOCT1 and hOCT2

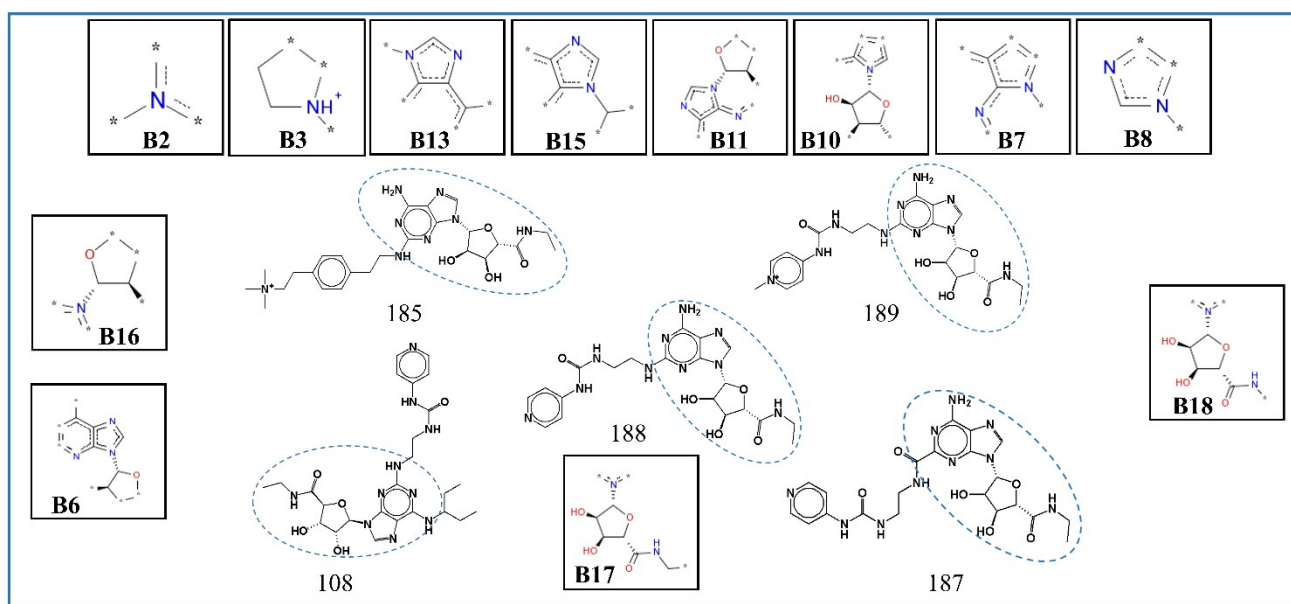

**Supplementary Figure 17.** Bad fingerprint B2, B3, B6, B7, B8, B10, B11, B13, B15, B16, B17, and B18 for combined hOCT1 and hOCT2

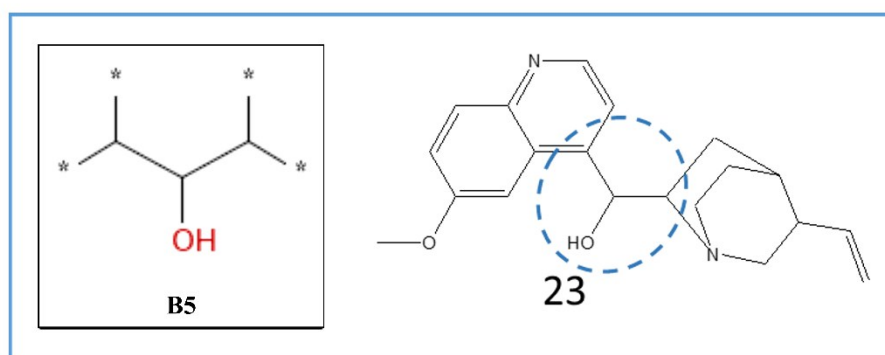

**Supplementary Figure 18.** Bad fingerprint B5 for combined hOCT1 and hOCT2

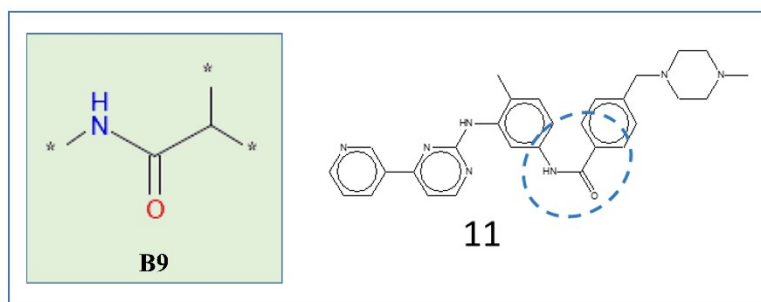

**Supplementary Figure 19.** Bad fingerprint B9 for combined hOCT1 and hOCT2

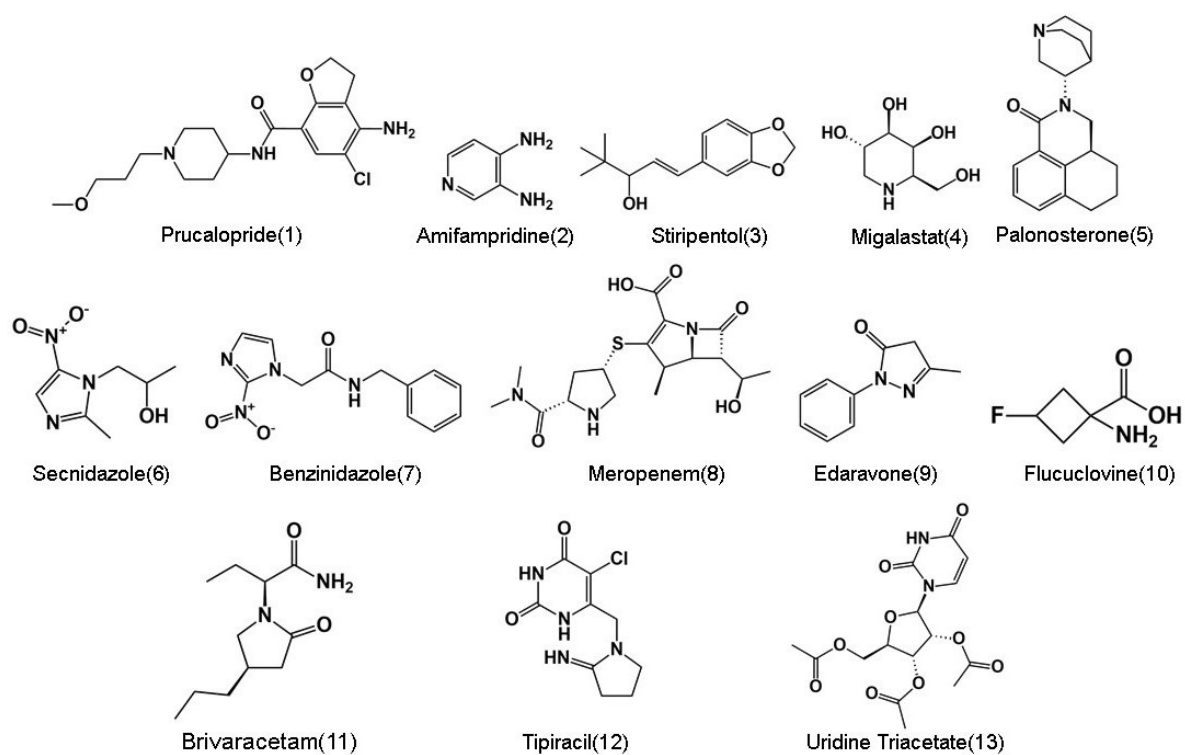

**Supplementary Figure 20.** Structure of possible hOCT substrates.

```

      1      10      20      30      40      50
hOCT1 .1 .MP TVDD ILEQV GESGW FQQAFL I L C LLSA AFAP I CVGIVFLGF TPDH C QSP
hOCT2 .2 MPT TVDD VLEHG GE F H F F Q Q M F F L L A L L S A T F A P I Y V G I V F L G F T P D H R C R S P

      60      70      80      90     100
hOCT1 .1 GVAELS QRCGWSPA EELNY TVPGL GPAGEA FLG QCRRYEVDWNQS ALS CVDPLA
hOCT2 .2 GVAELS LRCGWSPA EELNY TVPGL GPAGEA SPR QCRRYEVDWNQS TFD CVDPLA

     110     120     130     140     150     160
hOCT1 .1 SLATNRS HPLGPC D G W V Y D T P G S S I V T E F N L V C A D S W K L D L F Q S C L N A G F L F
hOCT2 .2 S L D T N R S R L P L G P C R D G W V Y E T P G S S I V T E F N L V C A N S W M L D L F Q S S V N V G F F I

     170     180     190     200     210
hOCT1 .1 G S L G V G Y F A D R F G R K L C L L C T V L V N A V S G V L M A F S P N Y M S M L L F R L L Q G L V S K G
hOCT2 .2 G S M S I G Y I A D R F G R K L C L L T V L I N A A G V L M A F S P T Y T W M L I F R L I Q G L V S K A

     220     230     240     250     260
hOCT1 .1 N W M A G Y T L I T E F V G S G S R R T V A I M Y Q M A F T V G L V A L T G L A Y A L P H R W R L Q L A V S
hOCT2 .2 G W L I G Y I L I T E F V G R R Y R R T V G I F Y Q V A Y T V G L L V L A G V A Y A L P H R W R L Q F T V S

     270     280     290     300     310     320
hOCT1 .1 L P T F L F L L Y W C V P E S P R W L I S Q K R N T E A I K I M D H I A Q K N G K L P P A D L K M L S L E
hOCT2 .2 L P N F F L L Y W C I P E S P R W L I S Q N K N A E A M R I I K H I A K K N G K S L P A S L Q R I R L E

     330     340     350     360     370
hOCT1 .1 E D V T E K I S P S F A D L F R T P R T R K R T F I L M Y L W F T D S V L Y Q G L I L H M G A T S G N L Y L
hOCT2 .2 E E T G R K L N P S F L D L V R T P Q I R K H T M I L M Y N W F T S S V L Y Q G L I M H M G L A G D N I Y L

     380     390     400     410     420     430
hOCT1 .1 D F L Y S A L V E I E G A F I A L I T I D R V G R I Y P M A M S N L L A G A A C L V M F I S P D L H W L N
hOCT2 .2 D F F Y S A L V E F P A A F M I I L T I D R I G R Y P W A A S N M V A G A A C L A S V F I P G D L Q W L K

     440     450     460     470     480
hOCT1 .1 I I M C V G R M G I T A I C M I C L V N A E L Y P T F V R N L G V M V C S S L C D I G G I I T P F I V F
hOCT2 .2 I I S C L G R M G I T M A Y E I V C L V N A E L Y P T F I R N L G V H I C S S M C D I G G I I T P F L V Y

     490     500     510     520     530
hOCT1 .1 R L R E V W Q A L P L I L F A V L G L L A G V T L L L P E T K G V A L P E T M K D A E N L G R K A K P K E
hOCT2 .2 R L T N I W L E L P L M V F S V L G L V A G G L V L L L P E T K G K A L P E T I E A E N M Q R P R K N K E

     540     550
hOCT1 .1 N T I Y L K V Q T S E P S G T
hOCT2 .2 K M I Y L Q V Q K L D I P L N

```

Supplementary Figure 21. Sequence alignment for hOCT1 and hOCT2
